# Supplementary material for: Novel N-Arylaminophosphonates Bearing a Pyrrole Moiety and Their Ecotoxicological Properties
Source: MDPI journal article supplement (doi:10.3390/molecules22071132), 2017-07-07
Supplement: s1 [file s1]

# Novel, N-arylamino phosphonates Bearing a Pyrrole Moiety and Their Ecotoxicological Properties

Jarosław Lewkowski <sup>1,\*</sup>, Marta Morawska <sup>1</sup>, Anna Kaczmarek <sup>1,3</sup>, Diana Rogacz <sup>2</sup> and Piotr Rychter <sup>2,\*</sup>

<sup>1</sup> Department of Organic Chemistry, Faculty of Chemistry, University of Łódź, Tamka 12, 91-403 Łódź, Poland; mz.morawska@gmail.com (M.M.)

<sup>2</sup> Faculty of Mathematics and Natural Science, Jan Długosz University in Częstochowa, 13/15 Armii Krajowej Av., 42-200 Częstochowa, Poland; p.rychter@ajd.czyst.pl (P.R.); diana.rogacz@gmail.com (D.R.)

<sup>3</sup> M.Sc. student at the Faculty

\* Correspondence: jlewkow@uni.lodz.pl; Tel.: +48-42-635-5751

## Contents

**Figure S1.** <sup>1</sup>H NMR (a), COSY (b), <sup>13</sup>C NMR (c), HMQC (d) and <sup>31</sup>P NMR (e) spectra of diphenyl *N*-phenylamino(pyrrol-2-yl)-methylphosphonate (2a).

**Figure S2.** <sup>1</sup>H NMR (a), <sup>13</sup>C NMR (b) and <sup>31</sup>P NMR (c) spectra of diphenyl *N*-(4-nitrophenyl)-amino(pyrrol-2-yl)methylphosphonate (2b).

**Figure S3.** <sup>1</sup>H NMR (a), <sup>13</sup>C NMR (b) and <sup>31</sup>P NMR (c) spectra of diphenyl *N*-(4-chloro-2-methylphenyl)amino-(pyrrol-2-yl)methylphosphonate (2c).

**Figure S4.** <sup>1</sup>H NMR (a), <sup>13</sup>C NMR (b) and <sup>31</sup>P NMR (c) spectra of diphenyl *N*-(3-bromophenyl)-amino(pyrrol-2-yl)methylphosphonate (2d).

**Figure S5.** <sup>1</sup>H NMR (a), <sup>13</sup>C NMR (b) and <sup>31</sup>P NMR (c) spectra of diphenyl *N*-(1-naphthyl)amino-(pyrrol-2-yl)methylphosphonate (2e).

**Figure S6 a–e.** FT-IR spectra of aminophosphonates 2a–e

**Figure S7 a–e.** ESI-MS spectra of aminophosphonates 2a–e.

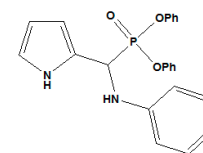

**Figure S1.**  $^1\text{H}$  NMR spectrum of diphenyl N-phenylamino(pyrrol-2-yl)-methylphosphonates (**2a**)

Figure S1a.  $^1\text{H}$ - $^1\text{H}$  COSY spectrum of diphenyl *N*-phenylamino(pyrrol-2-yl)-methylphosphonate (2a)- general review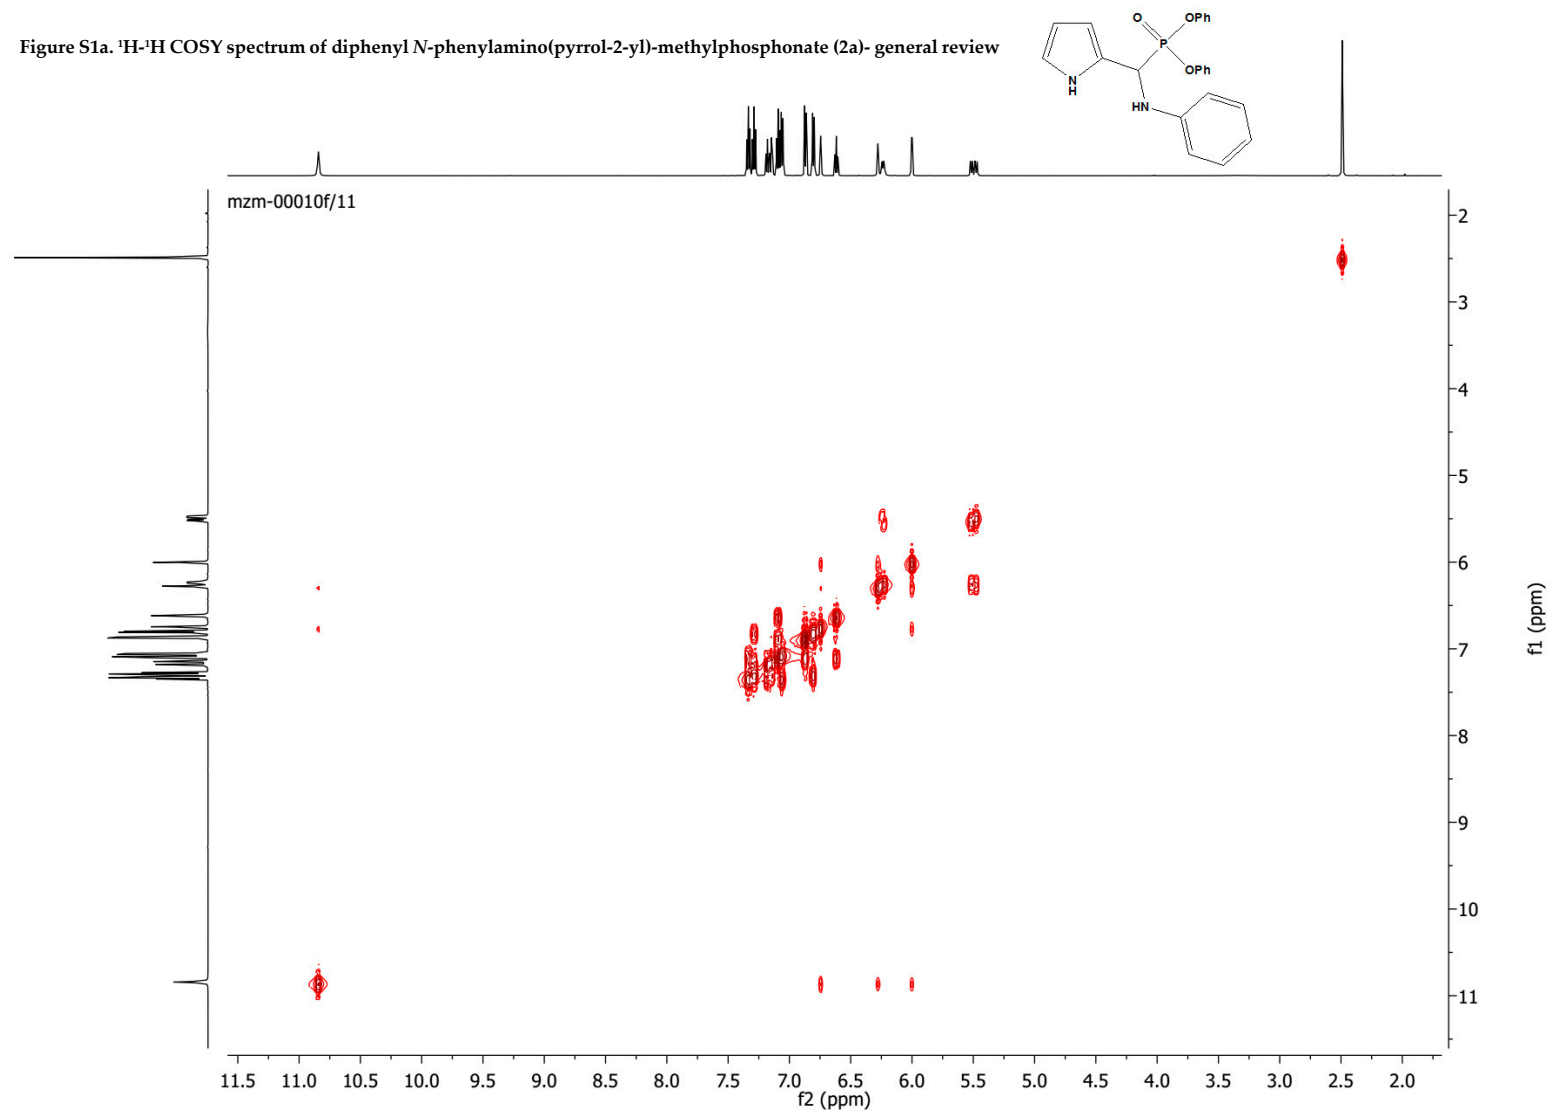

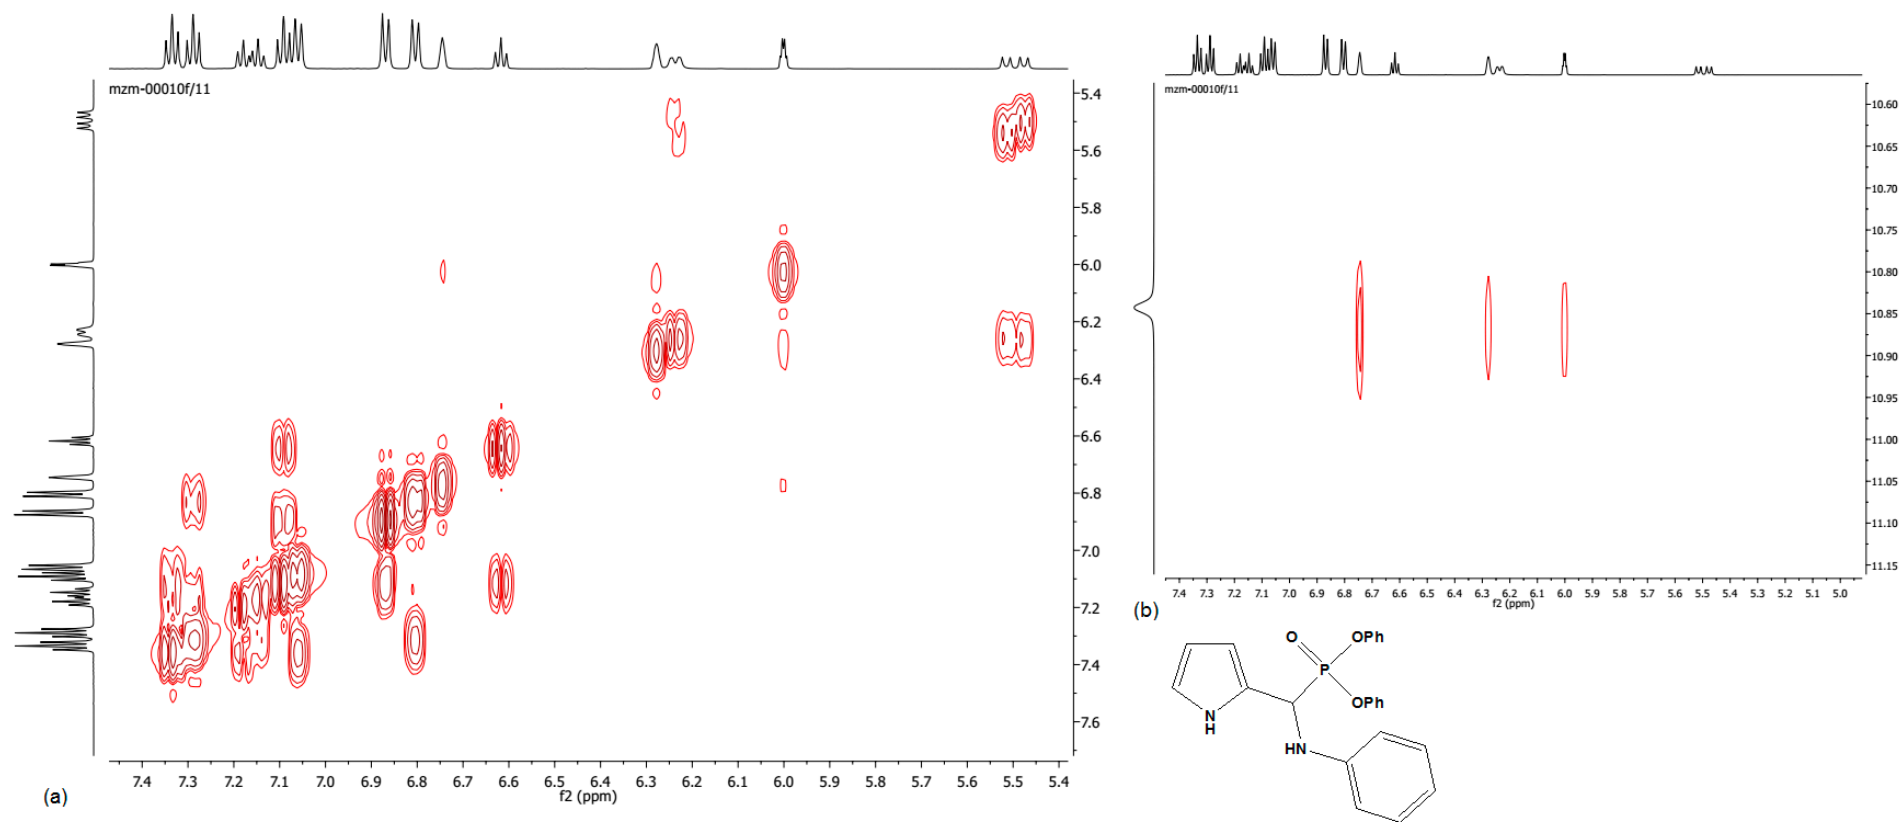

**Figure S1b (bis).**  $^1\text{H}$ - $^1\text{H}$  COSY spectrum of diphenyl *N*-phenylamino(pyrrol-2-yl)-methylphosphonate (**2a**): (a) 7.5 – 5.4 ppm region and (b) correlations in pyrrole ring

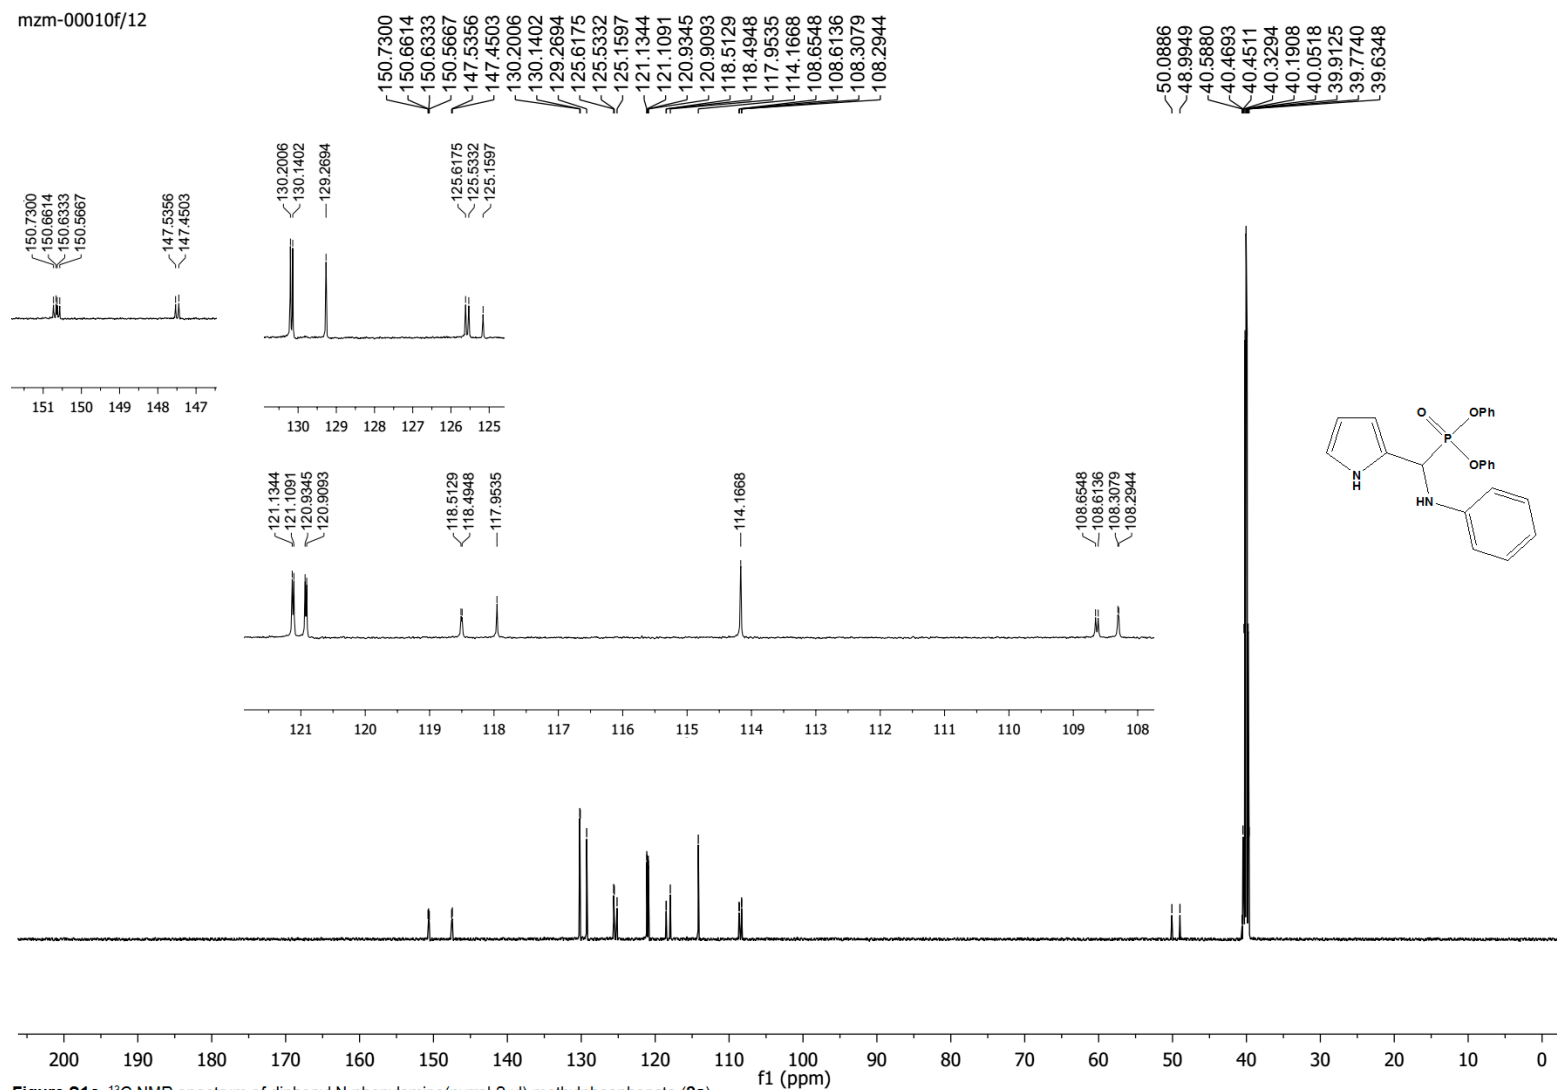

Figure S1c. <sup>13</sup>C NMR spectrum of diphenyl N-phenylamino(pyrrol-2-yl)-methylphosphonate (2a)

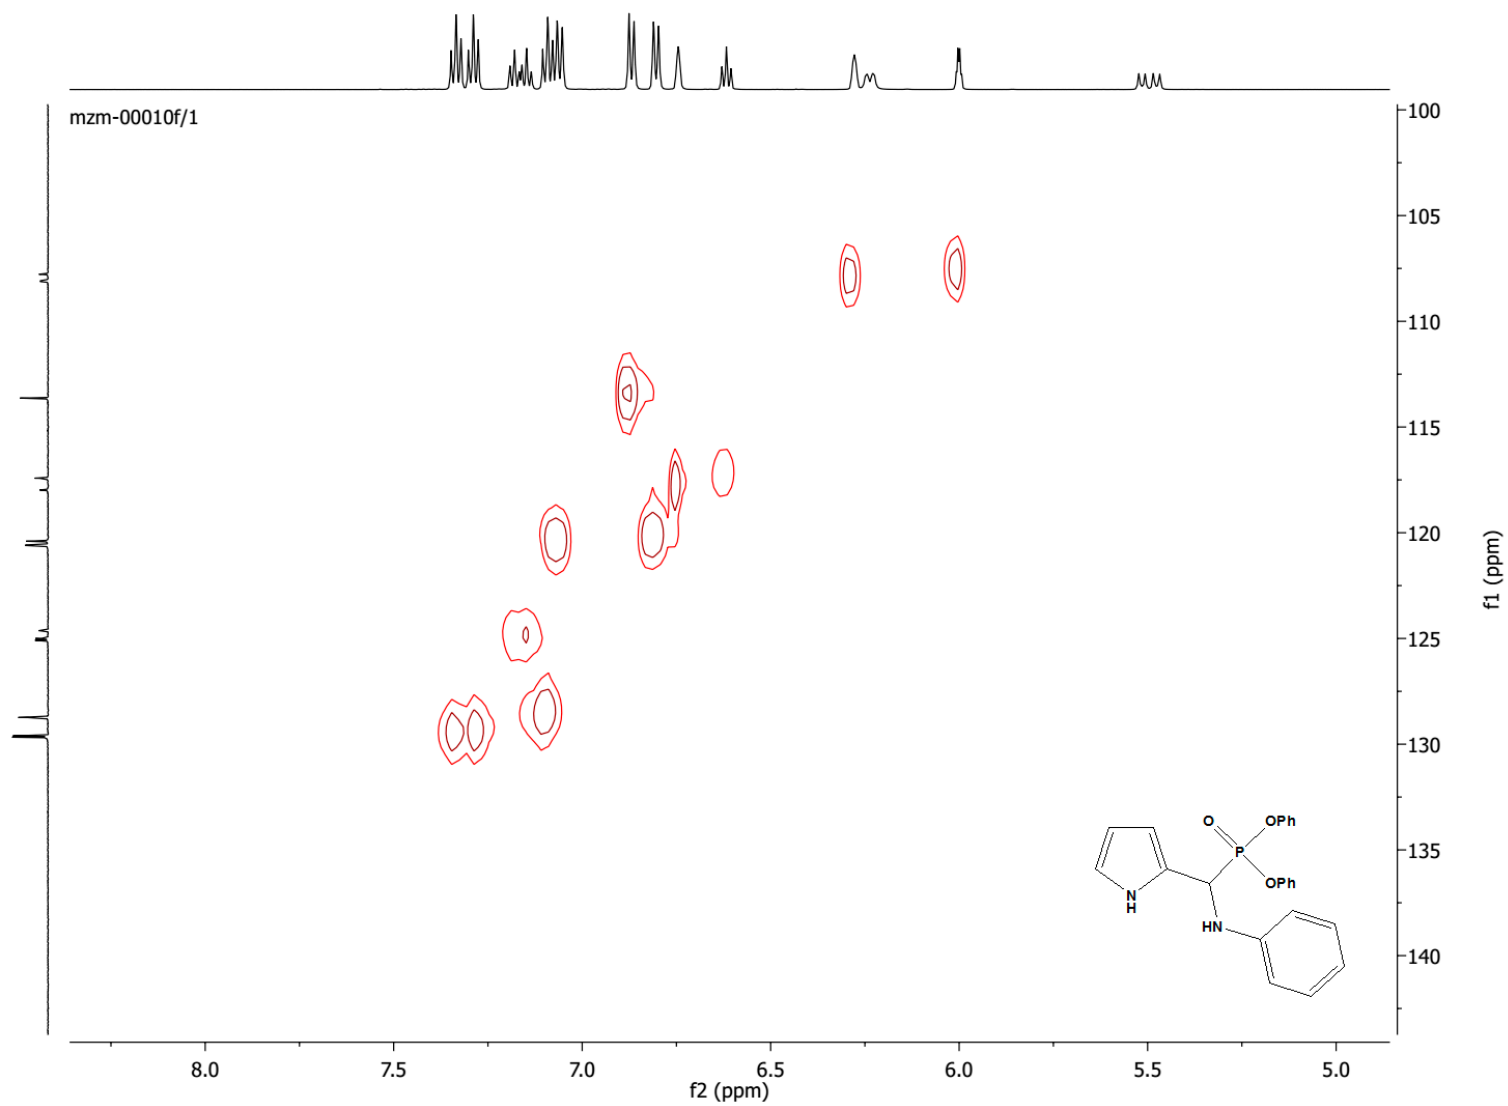

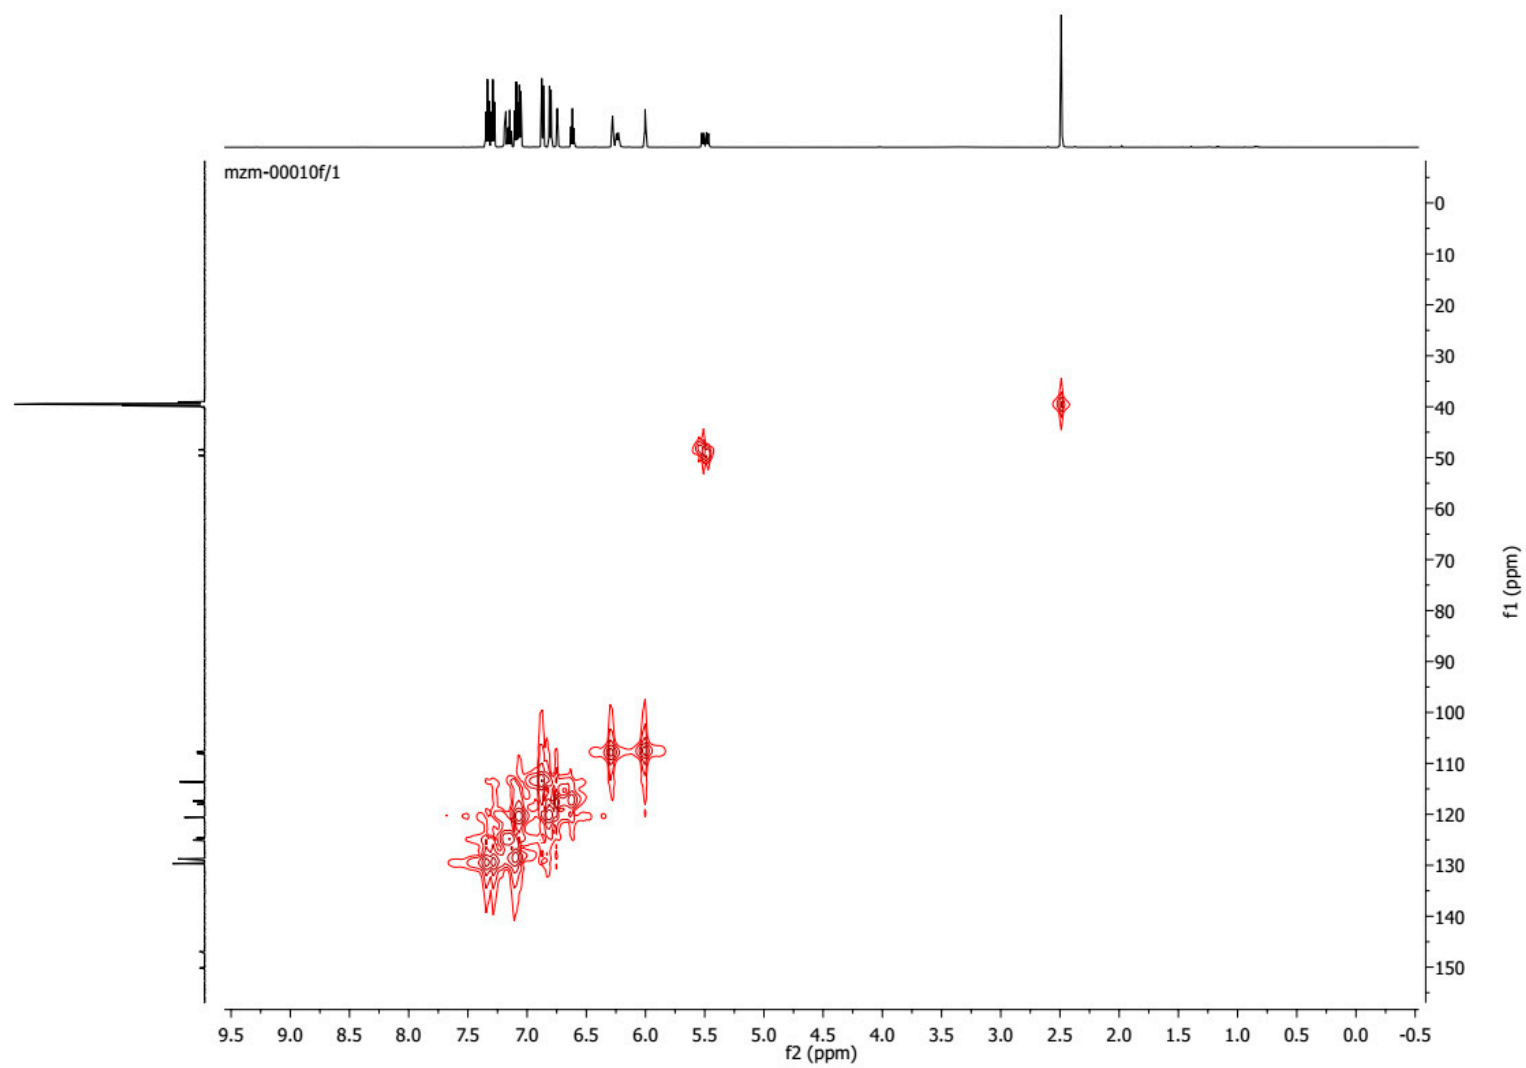Figure S1d *cont.*

mmp-00010f/2

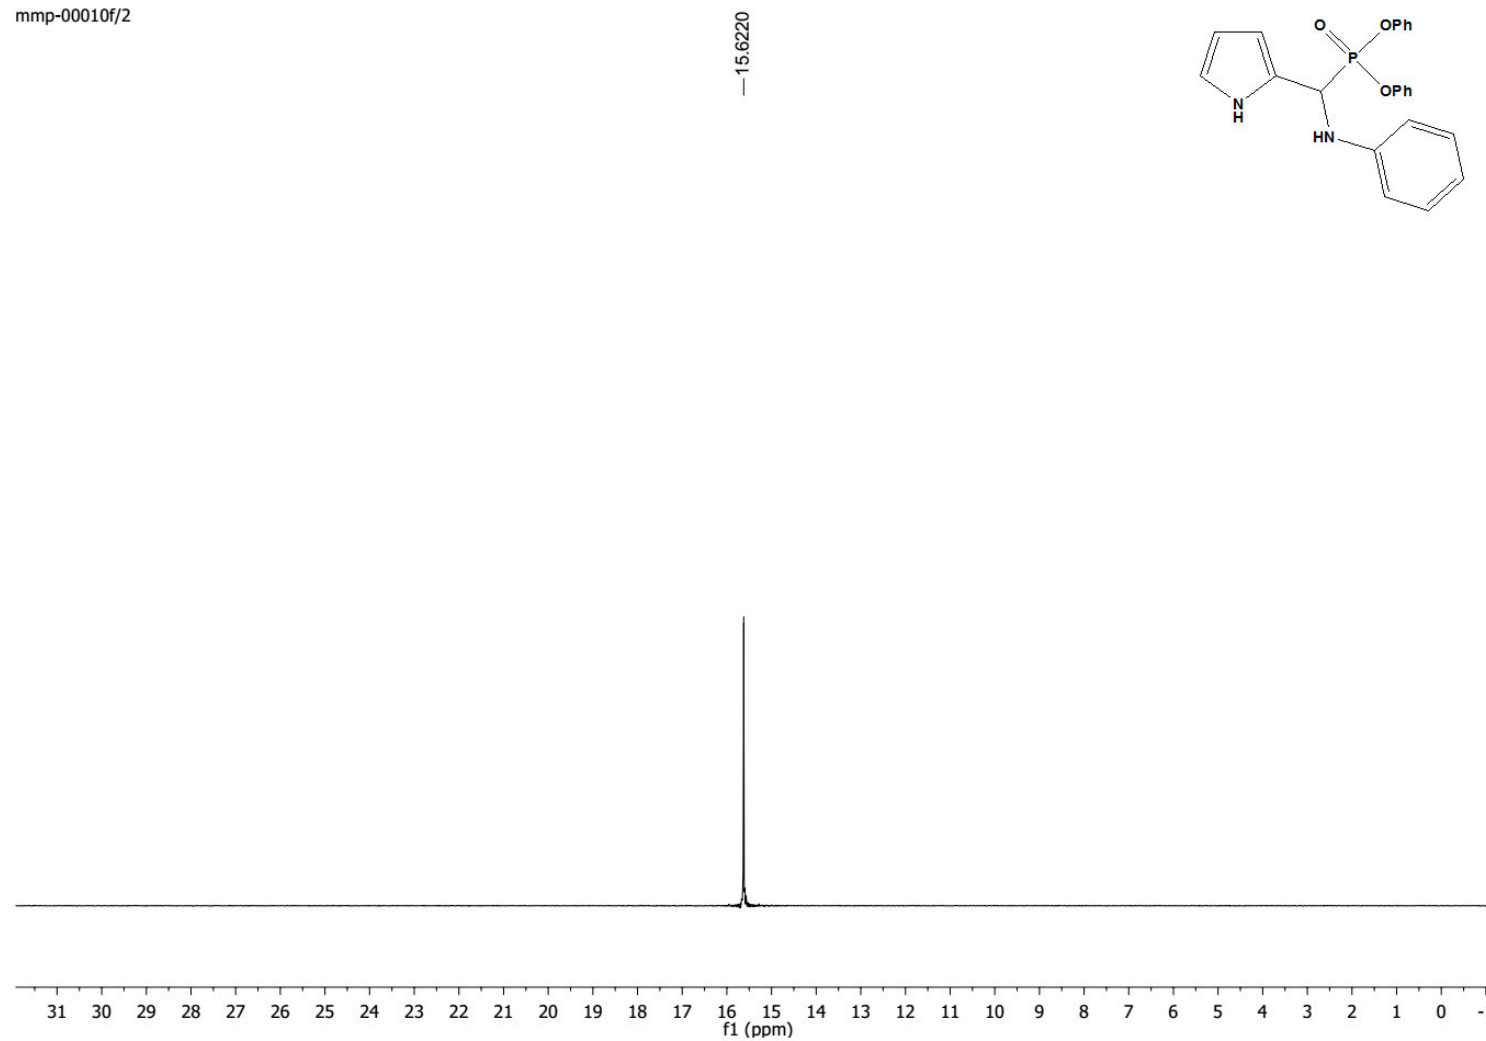**Figure S1e.**  $^{31}\text{P}$  NMR spectrum of diphenyl N-phenylamino(pyrrol-2-yl)-methylphosphonate (2a)



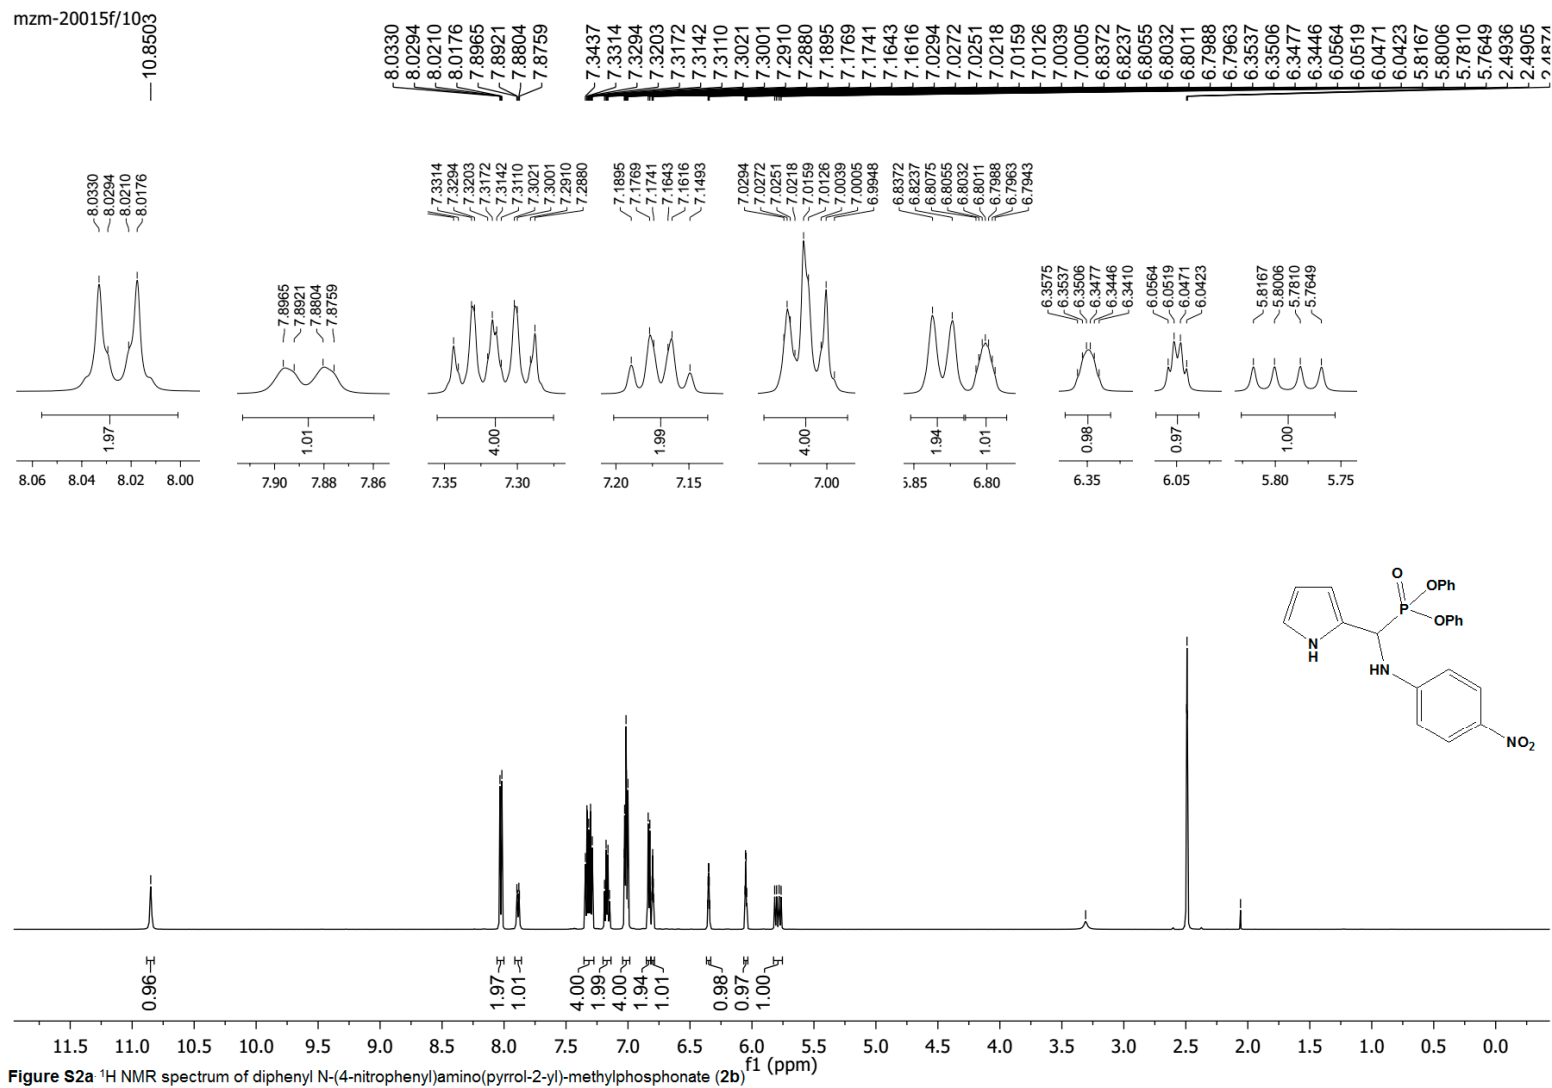Figure S2a <sup>1</sup>H NMR spectrum of diphenyl N-(4-nitrophenyl)amino(pyrrol-2-yl)-methylphosphonate (2b)

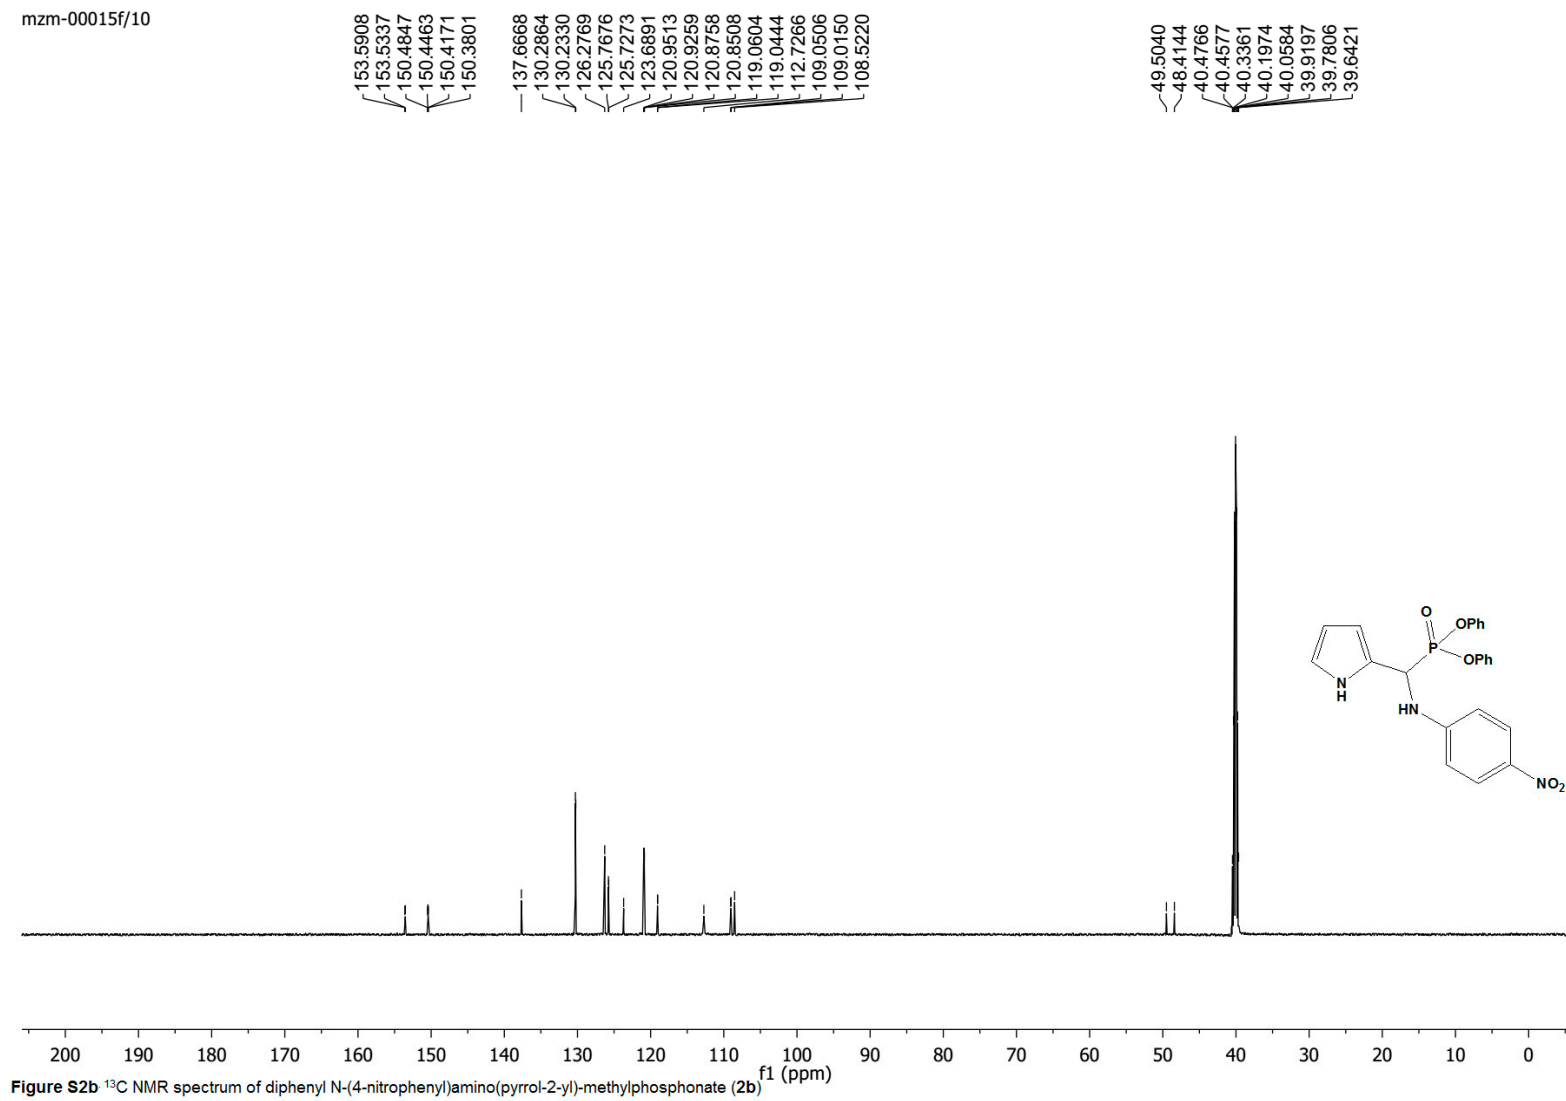

mmp-160115f-P  
kag-0001

—13.99

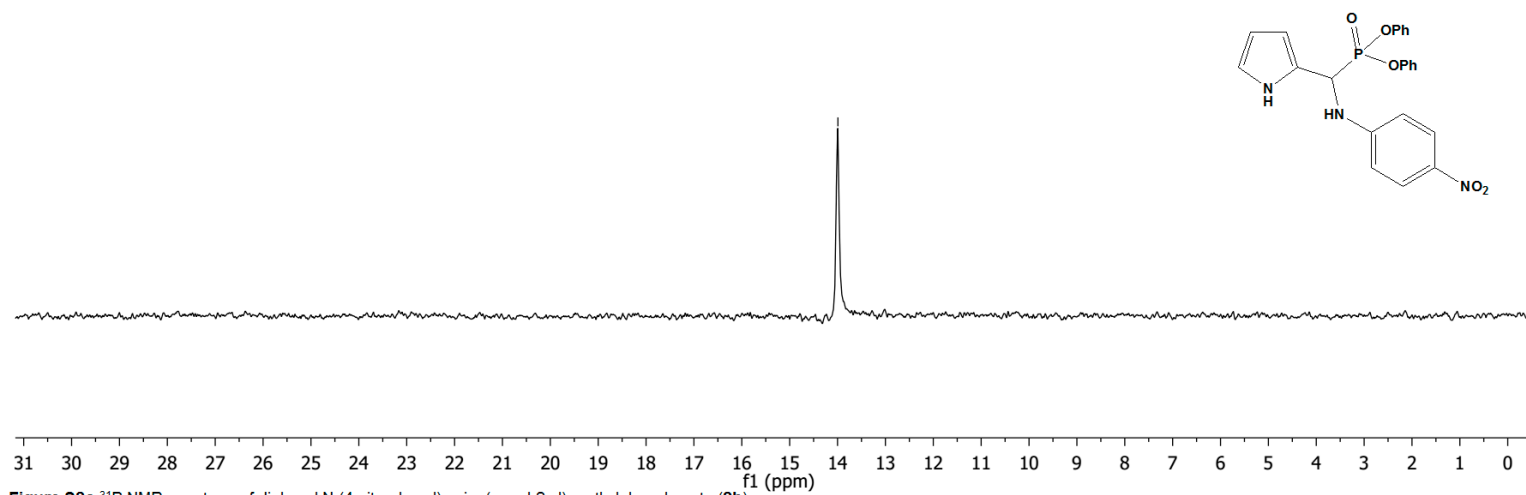

Figure S2c:  $^{31}\text{P}$  NMR spectrum of diphenyl N-(4-nitrophenyl)amino(pyrrol-2-yl)-methylphosphonate (2b)

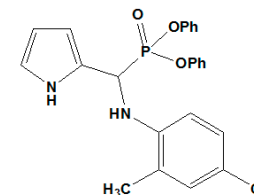

**Figure S3a:**  $^1\text{H}$  NMR spectrum of diphenyl N-(4-chloro-2-methylphenyl)amino(pyrrol-2-yl)-methylphosphonate (**2c**)

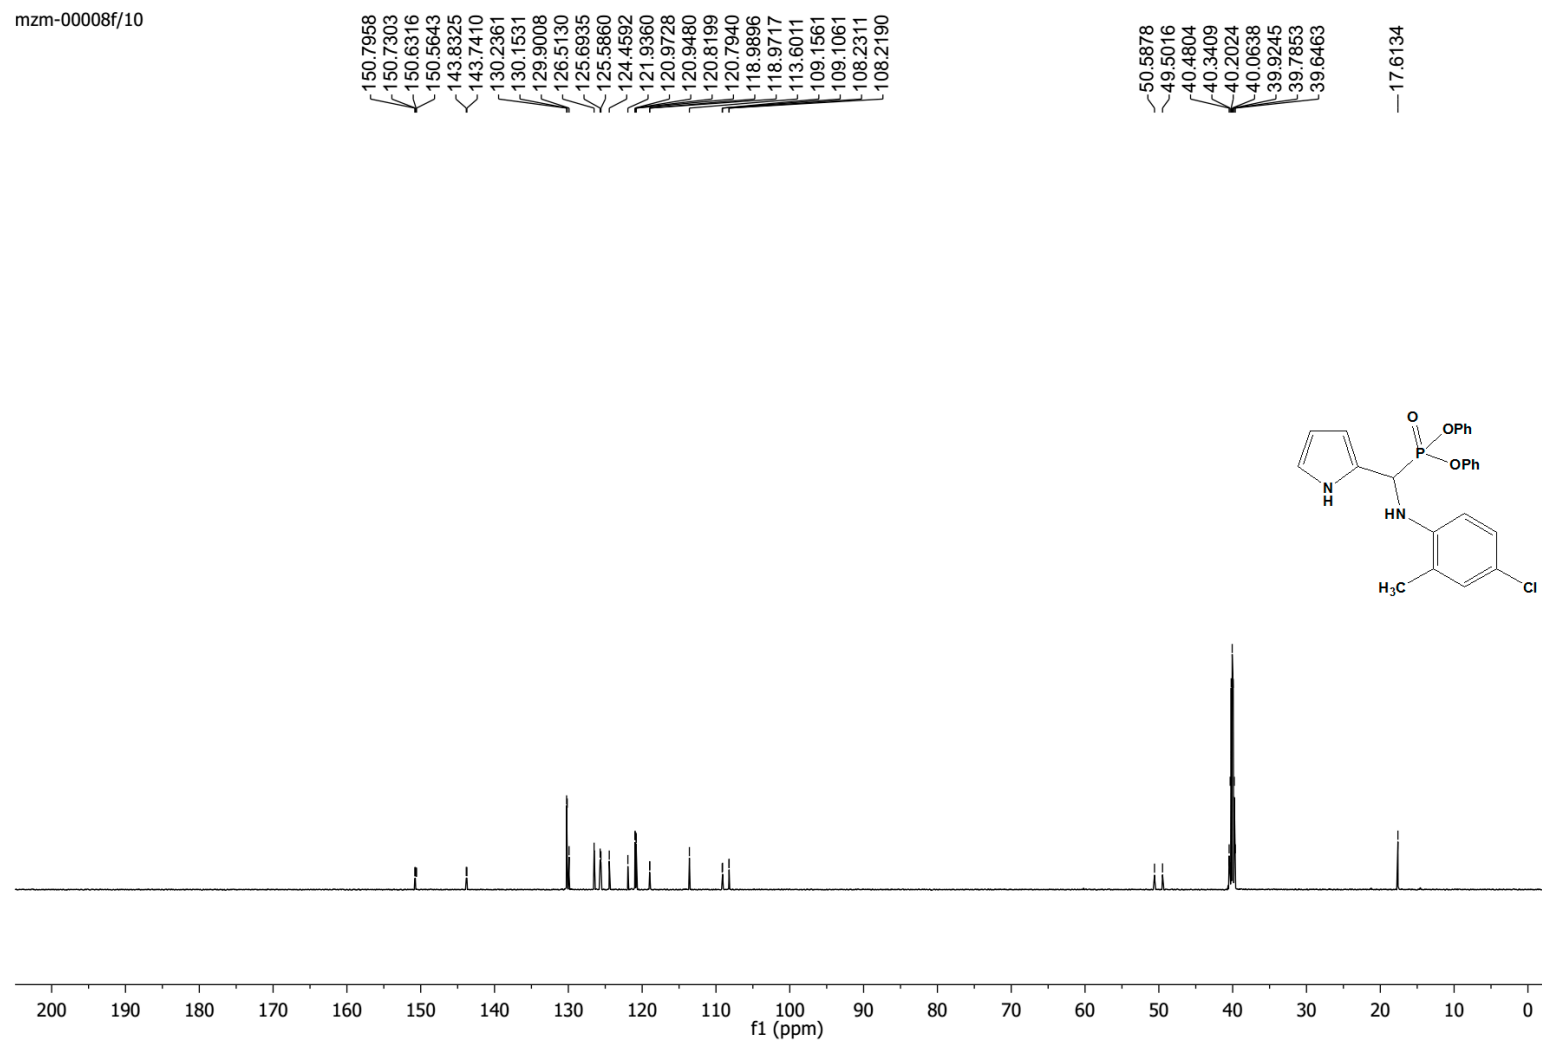

**Figure S3b**  $^{13}\text{C}$  NMR spectrum of diphenyl N-(4-chloro-2-methylphenyl)amino(pyrrol-2-yl)-methylphosphonate (2c)

mmp-16018F-P  
kag-0001

14.99  
14.95

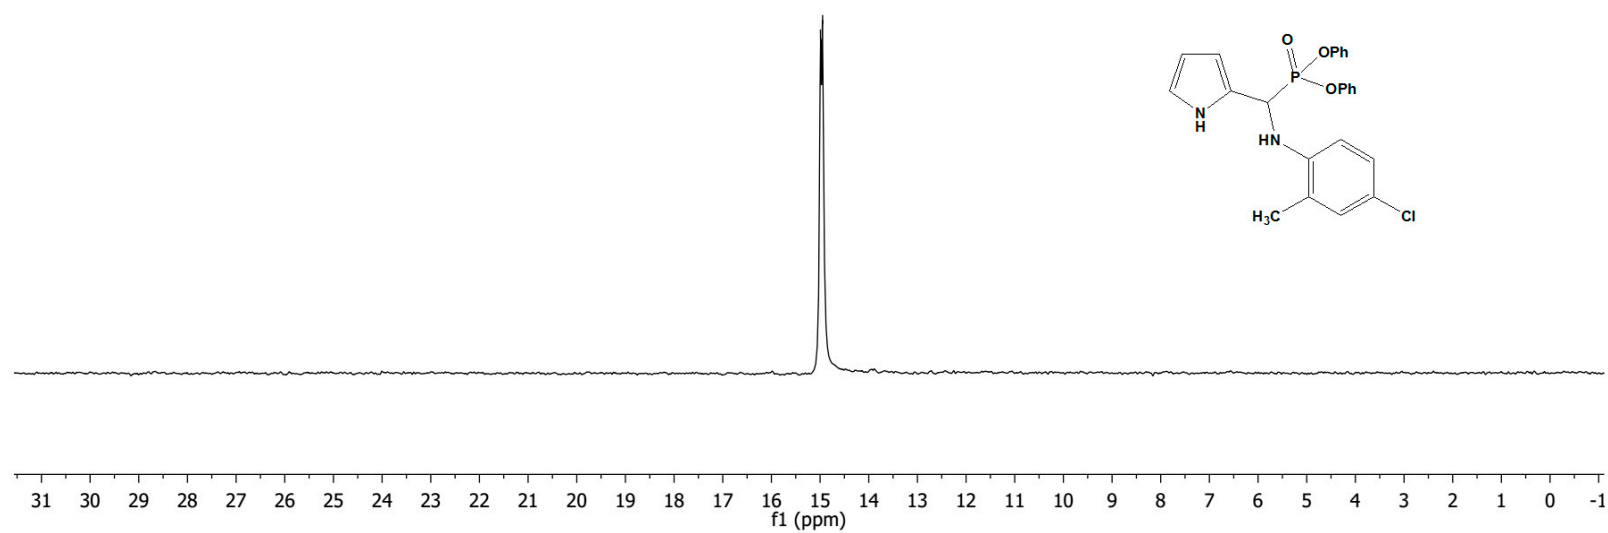

**Figure S3c**  $^{31}\text{P}$  NMR spectrum of diphenyl N-(4-chloro-2-methylphenyl)amino(pyrrol-2-yl)-methylphosphonate (2c)

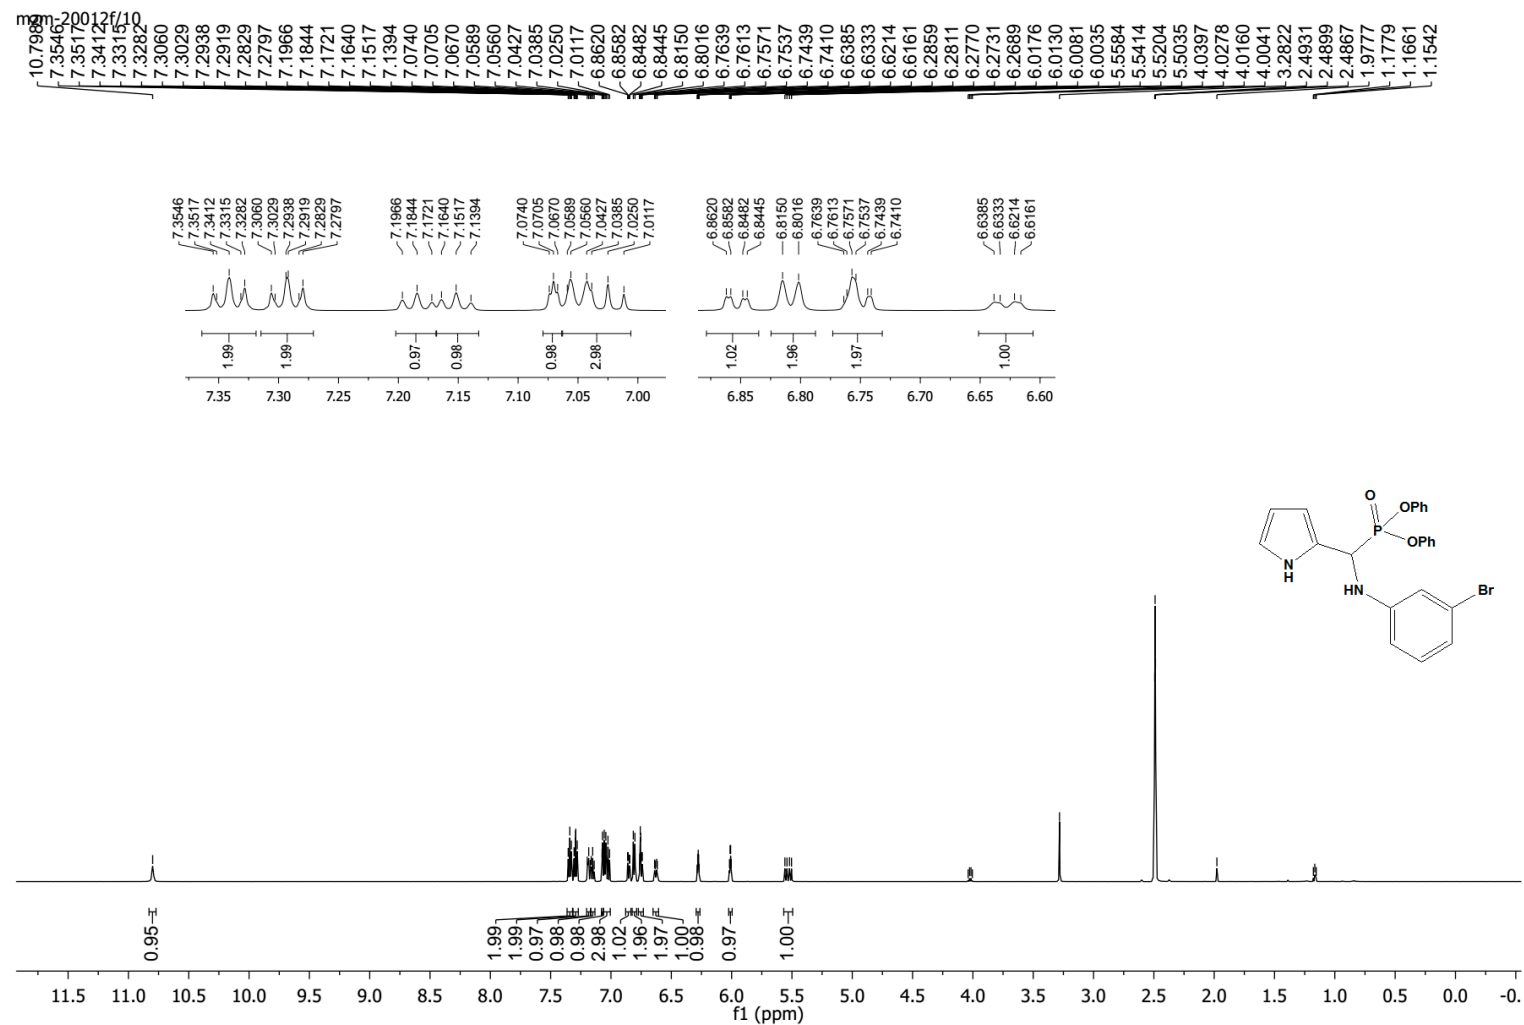Figure S4a <sup>1</sup>H NMR spectrum of diphenyl N-(3-bromophenyl)amino(pyrrol-2-yl)-methylphosphonate (2d)

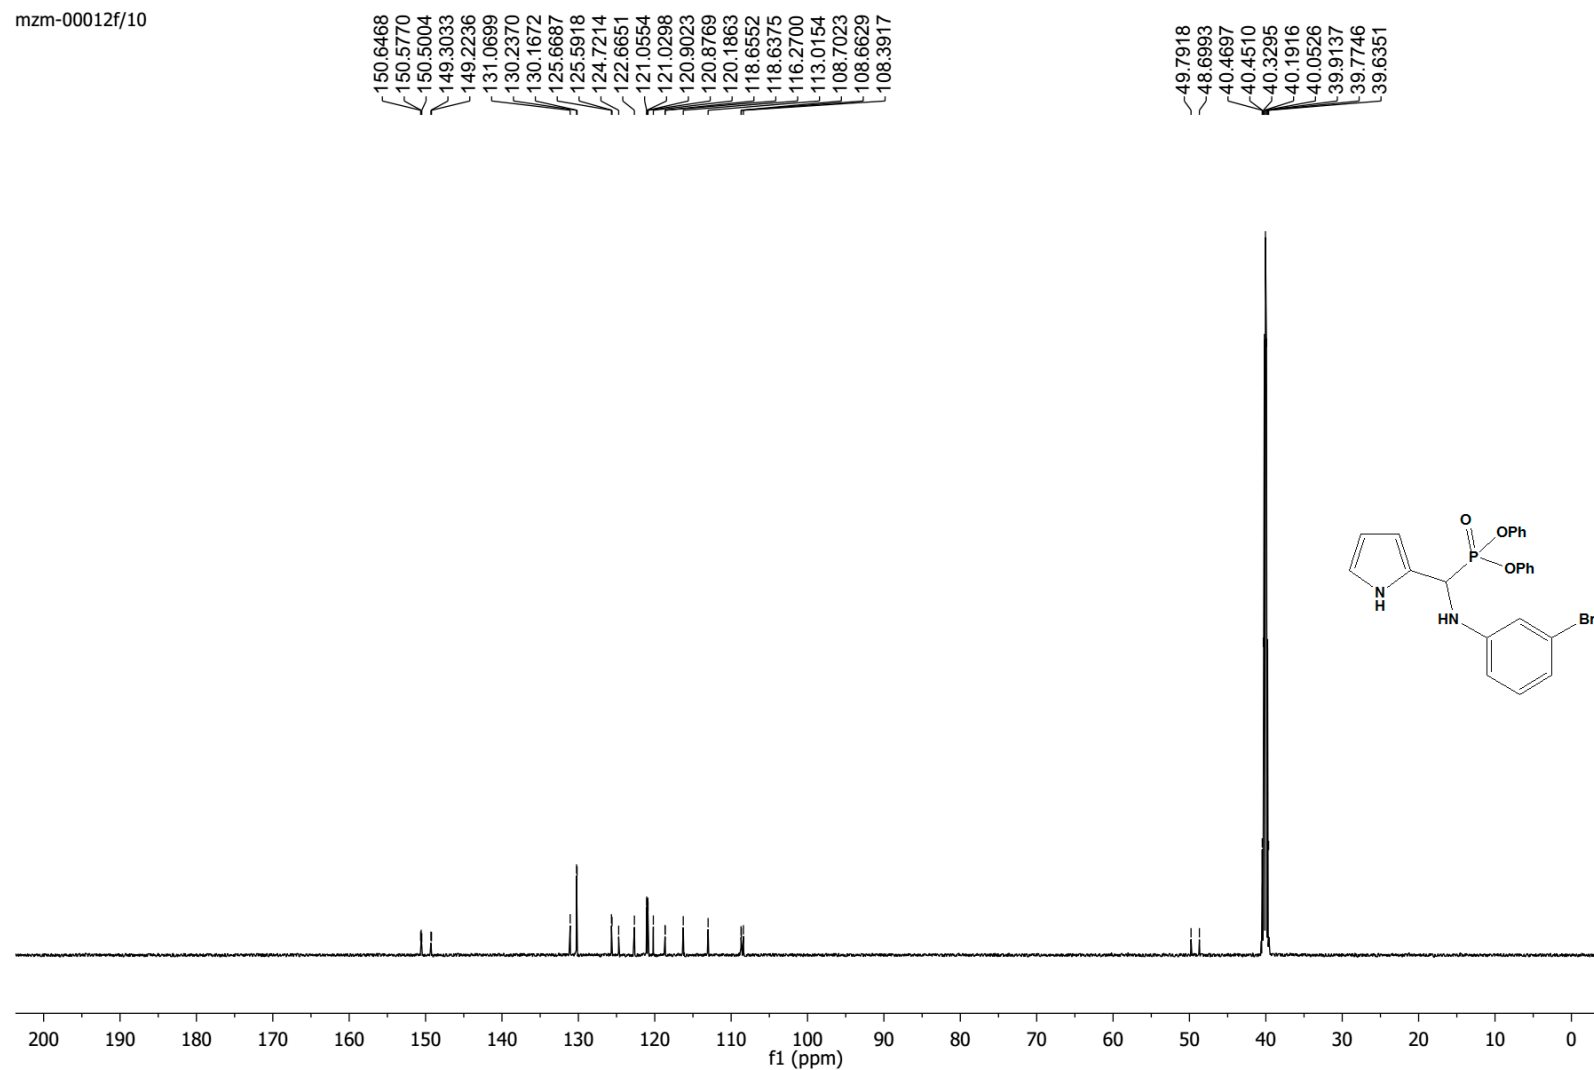



mzm-24412f/1

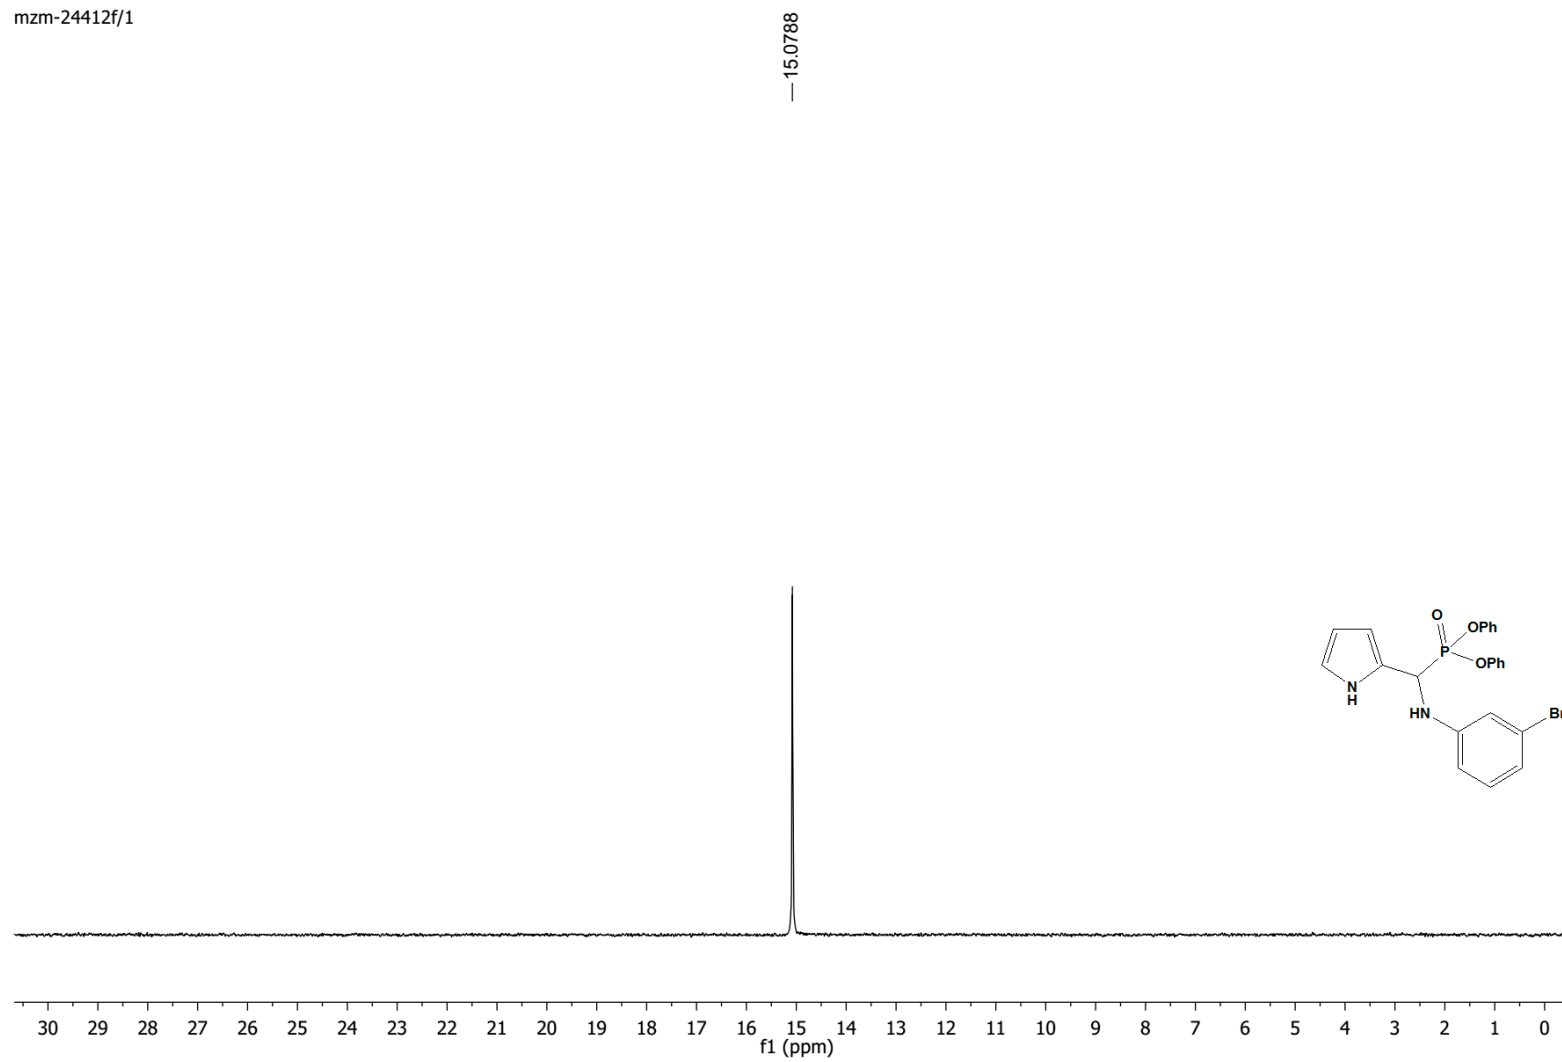**Figure S4c**  $^{31}\text{P}$  NMR spectrum of diphenyl N-(3-bromophenyl)amino(pyrrol-2-yl)-methylphosphonate (2d)

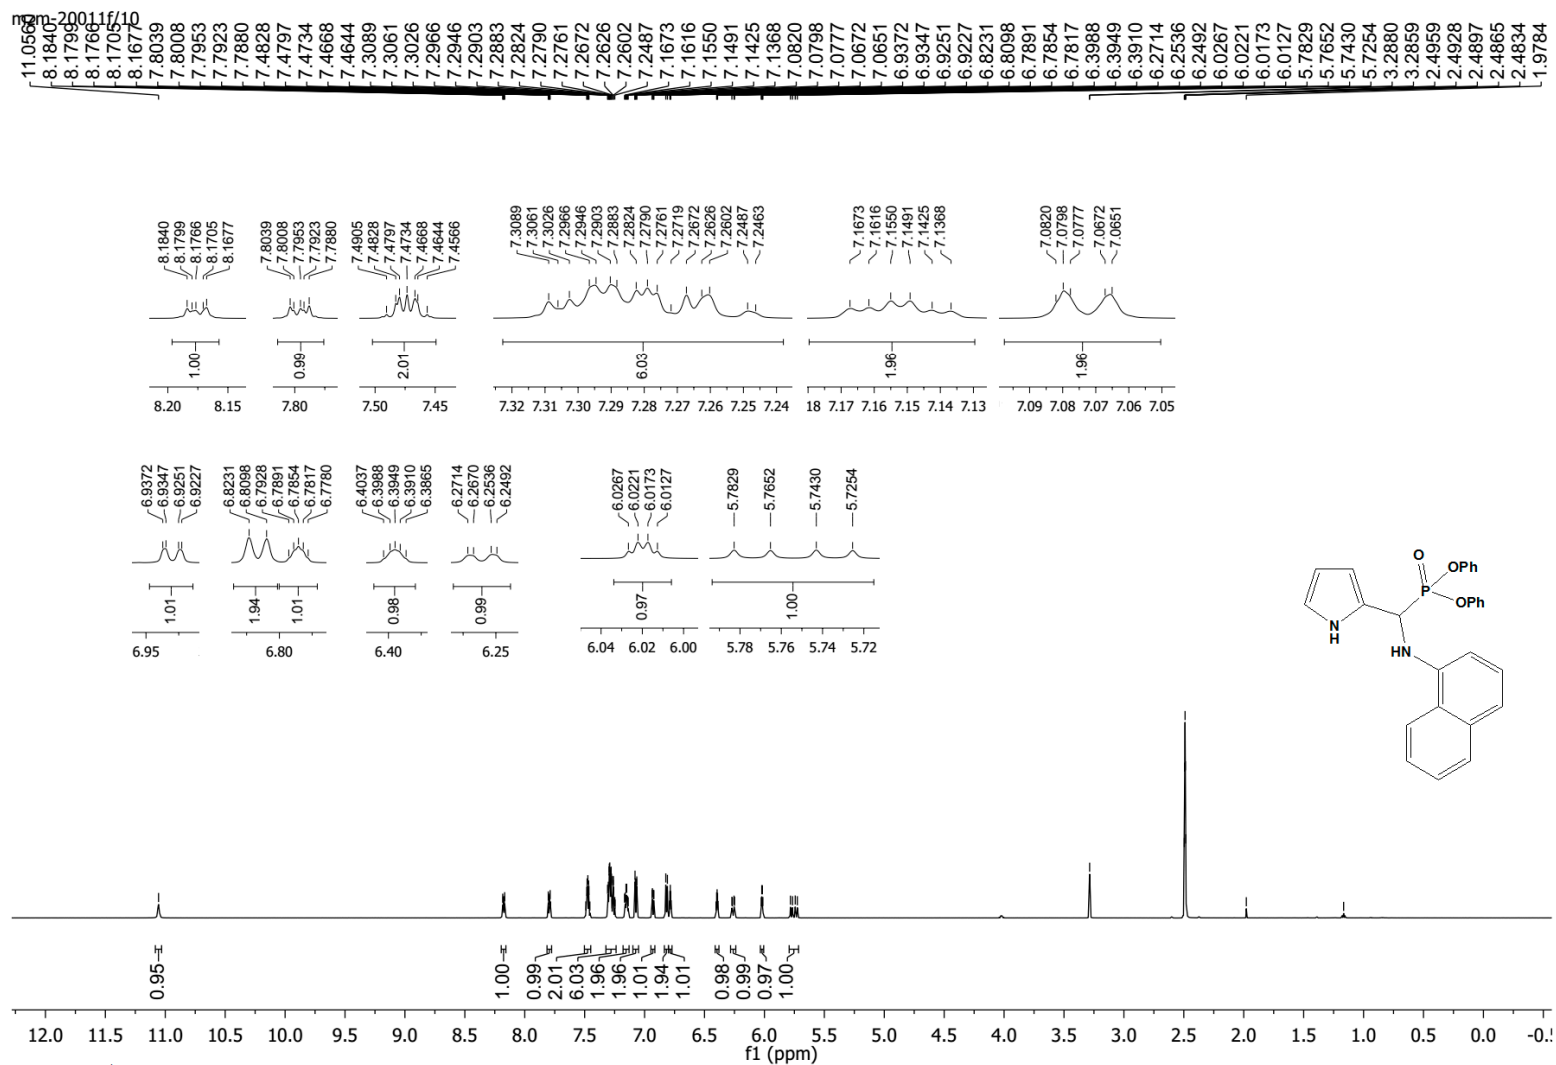Figure S5a <sup>1</sup>H NMR spectrum of diphenyl N-(1-naphthyl)amino(pyrrol-2-yl)-methylphosphonate (2e)

mzm-00011f/10

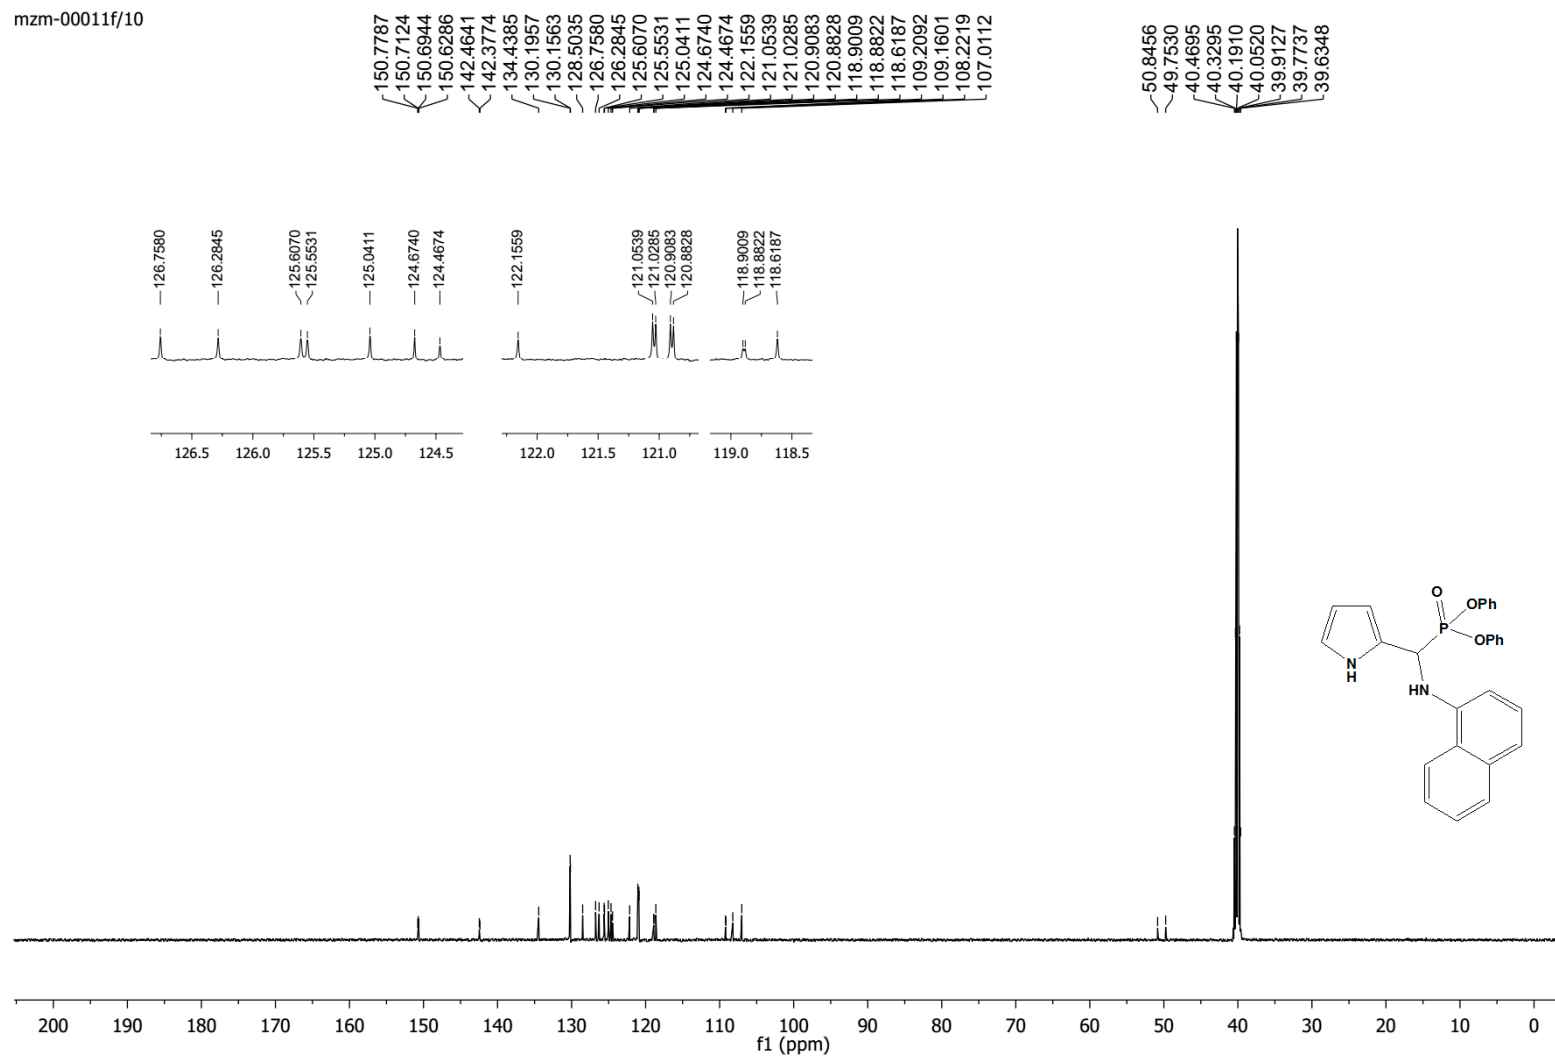Figure S5b <sup>13</sup>C NMR spectrum of diphenyl N-(1-naphthyl)amino(pyrrol-2-yl)-methylphosphonate (2e)

mmp-00011f/2

— 15.1392

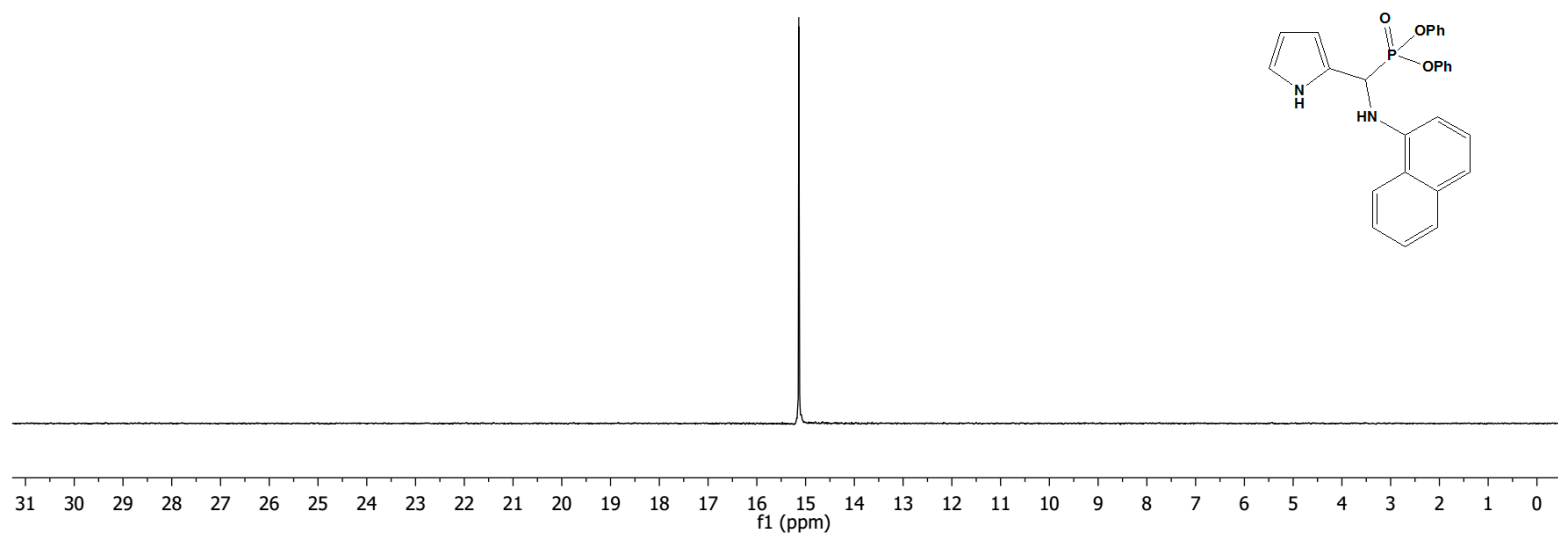**Figure S5c**  $^{31}\text{P}$  NMR spectrum of diphenyl N-(1-naphthyl)amino(pyrrol-2-yl)-methylphosphonate (2e)

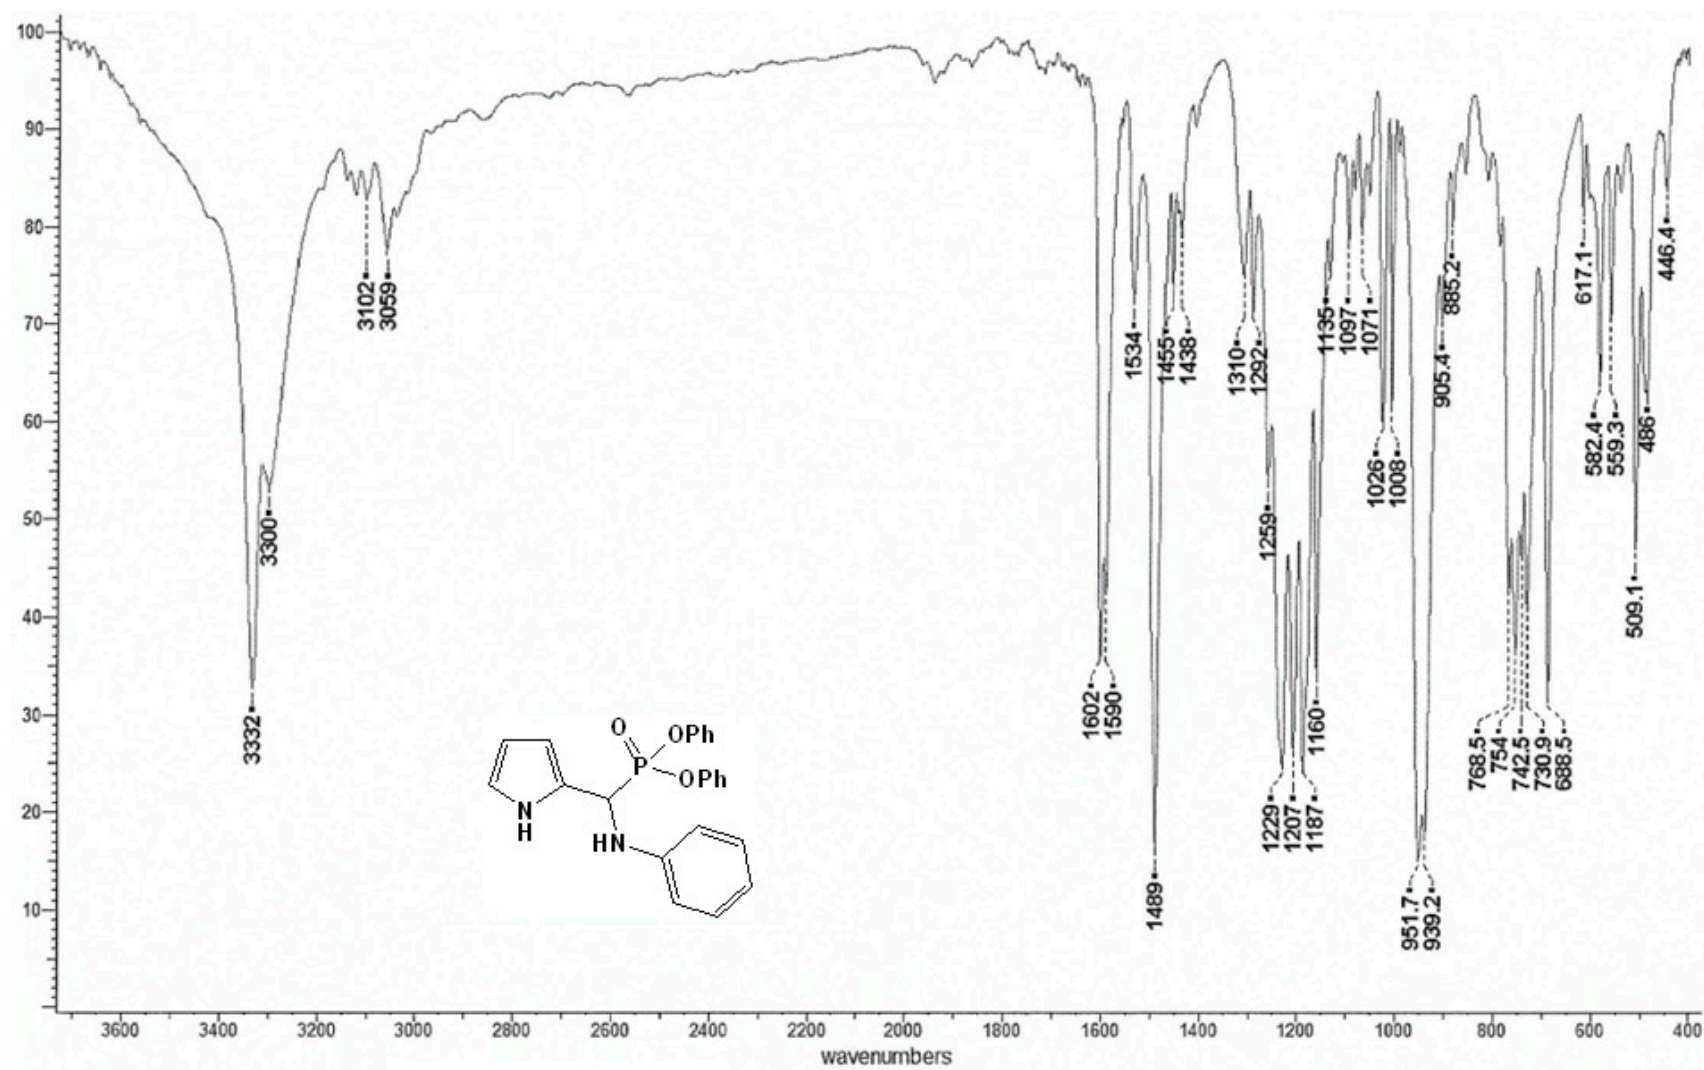

Figure S6a. FT-IR spectra of diphenyl N-phenylamino(pyrrol-2-yl)-methylphosphonate 2a

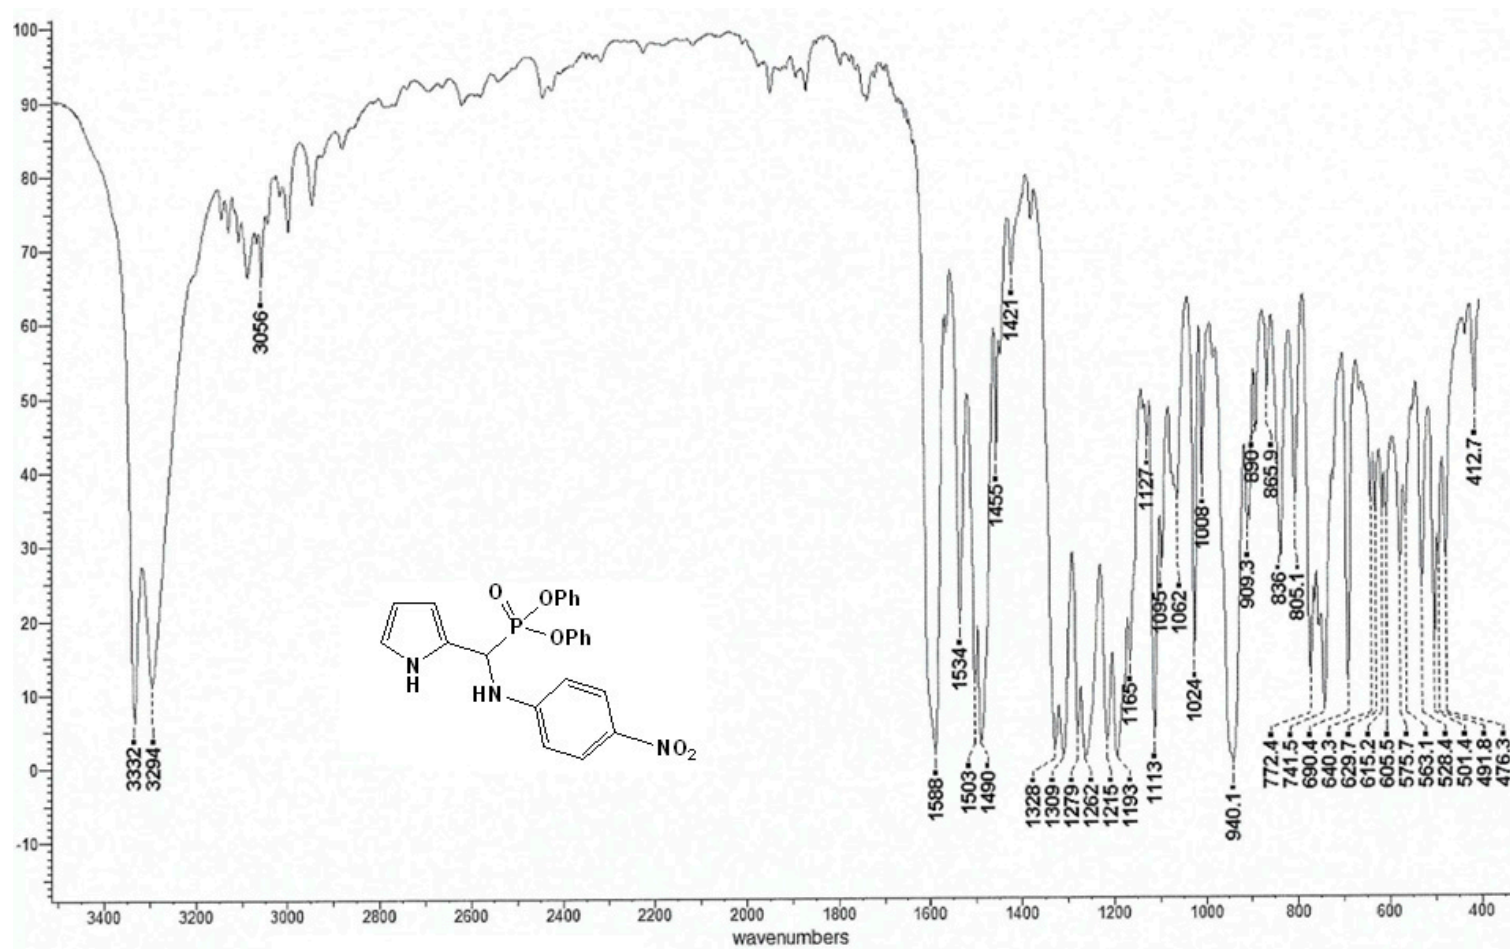

**Figure S6b.** FT-IR spectra of diphenyl N-(4-nitrophenyl)-amino(pyrrol-2-yl)methylphosphonate **2b**

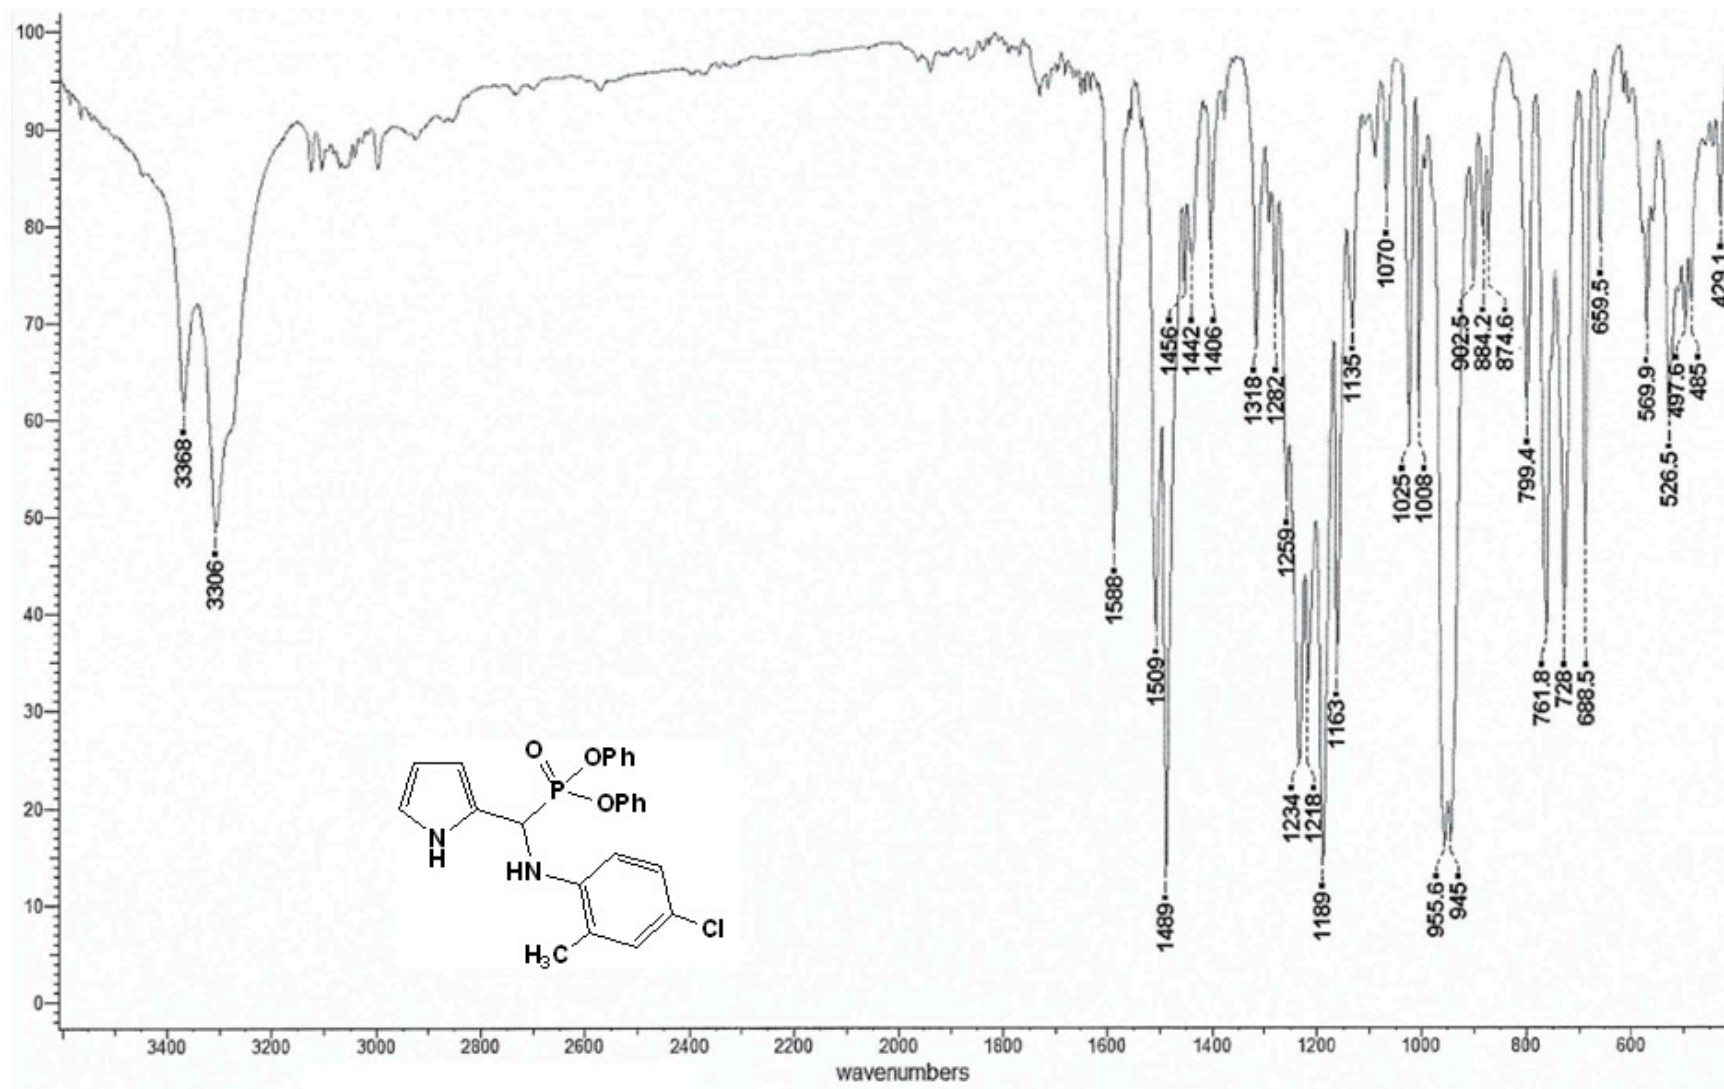

Figure S6c. FT-IR spectra of diphenyl N-(4-chloro-2-methylphenyl)amino-(pyrrol-2-yl)methylphosphonate 2c



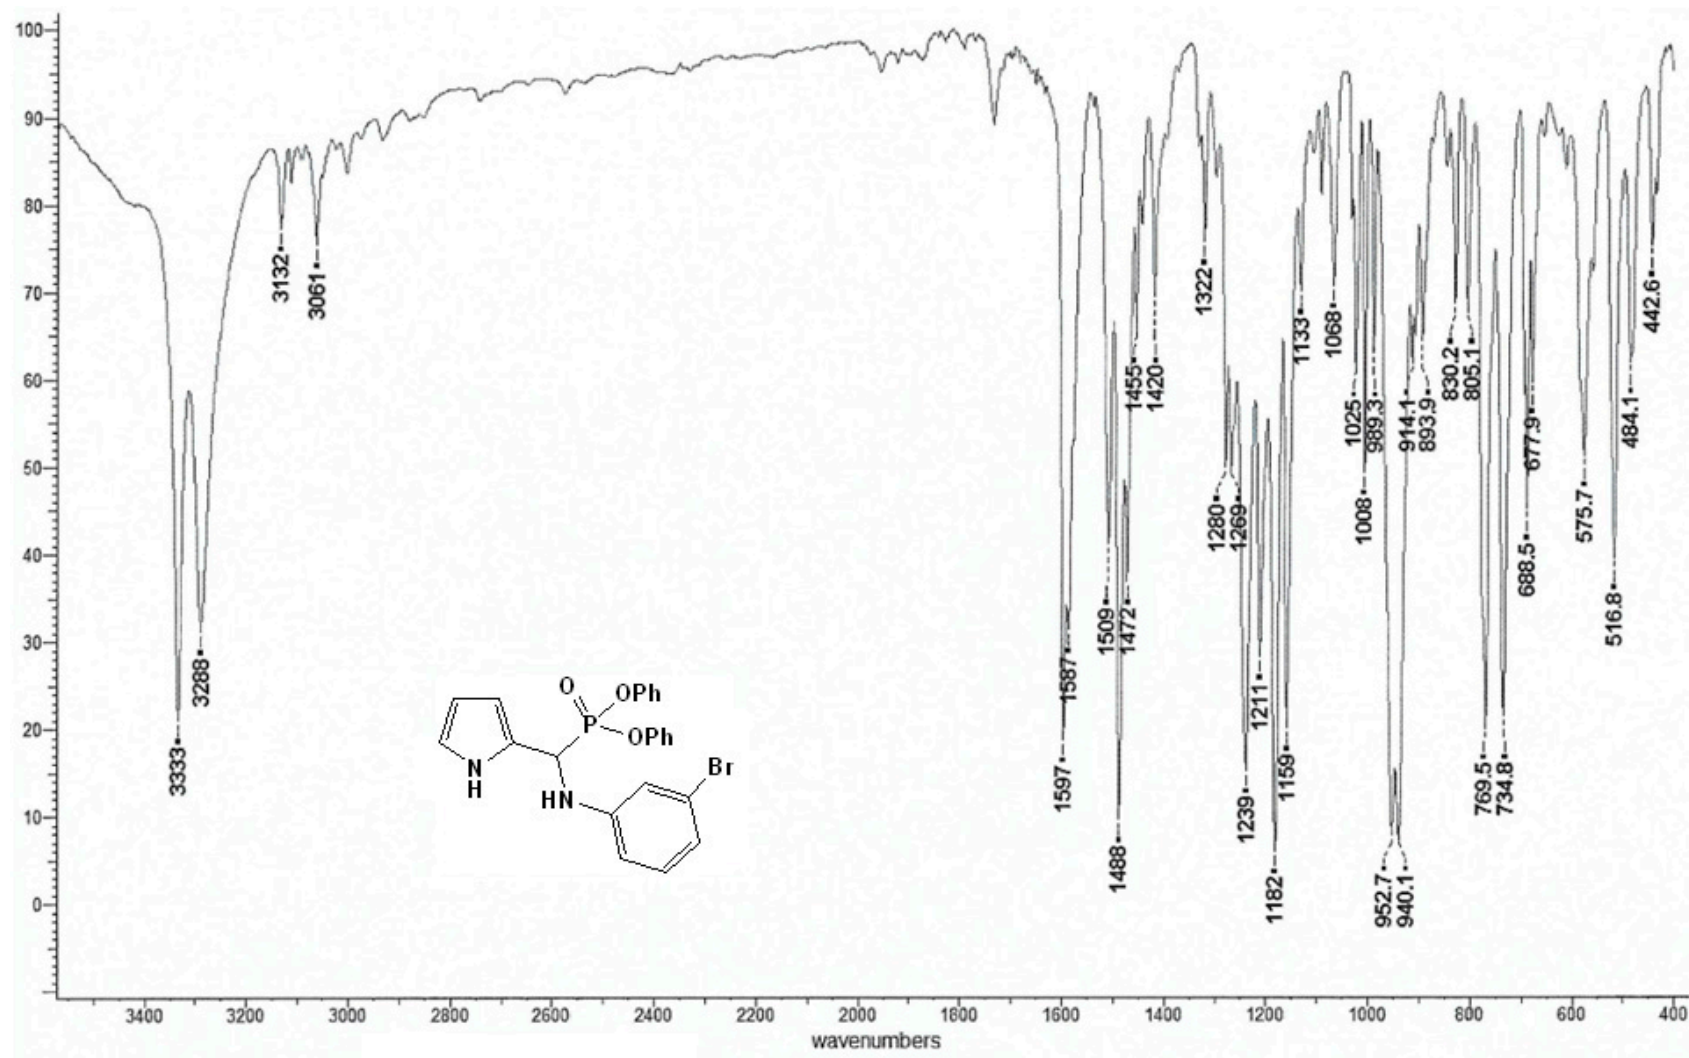

Figure S6d. FT-IR spectra of diphenyl N-(3-bromophenyl)-amino(pyrrol-2-yl)methylphosphonate 2d



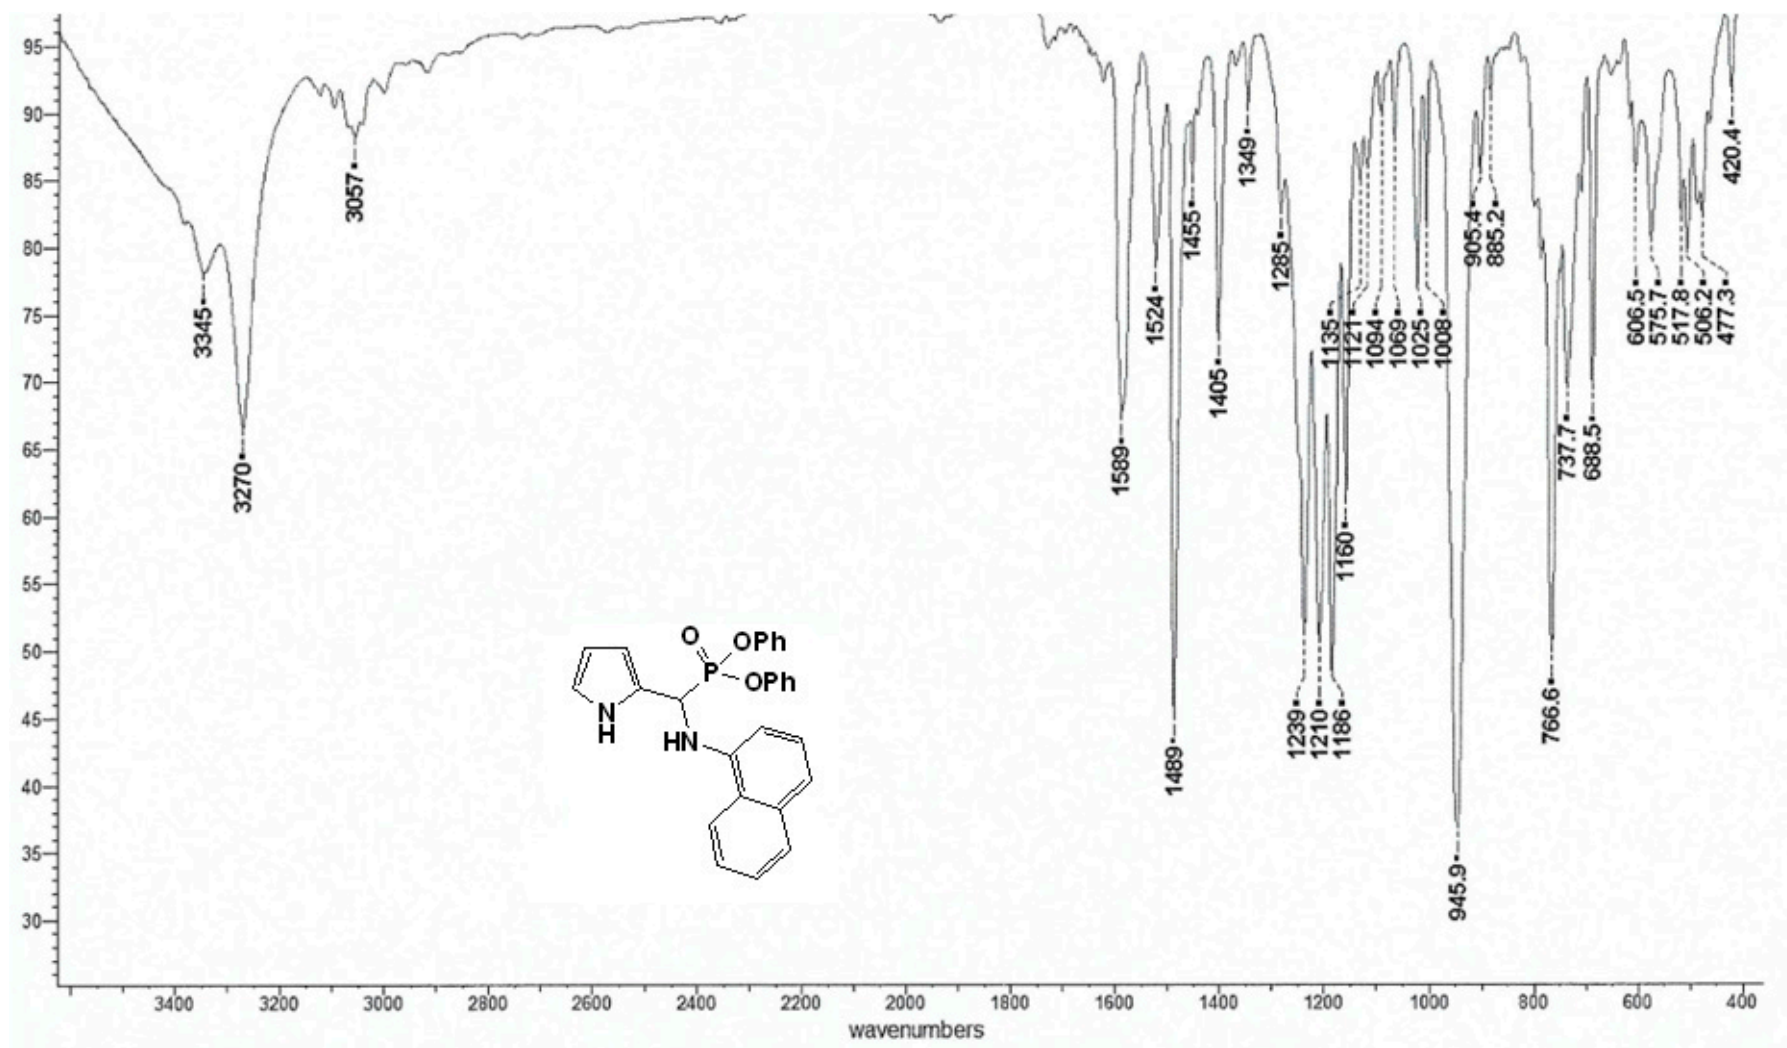

Figure S6e. FT-IR spectra of diphenyl N-(1-naphthyl)amino-(pyrrol-2-yl)methylphosphonate 2e

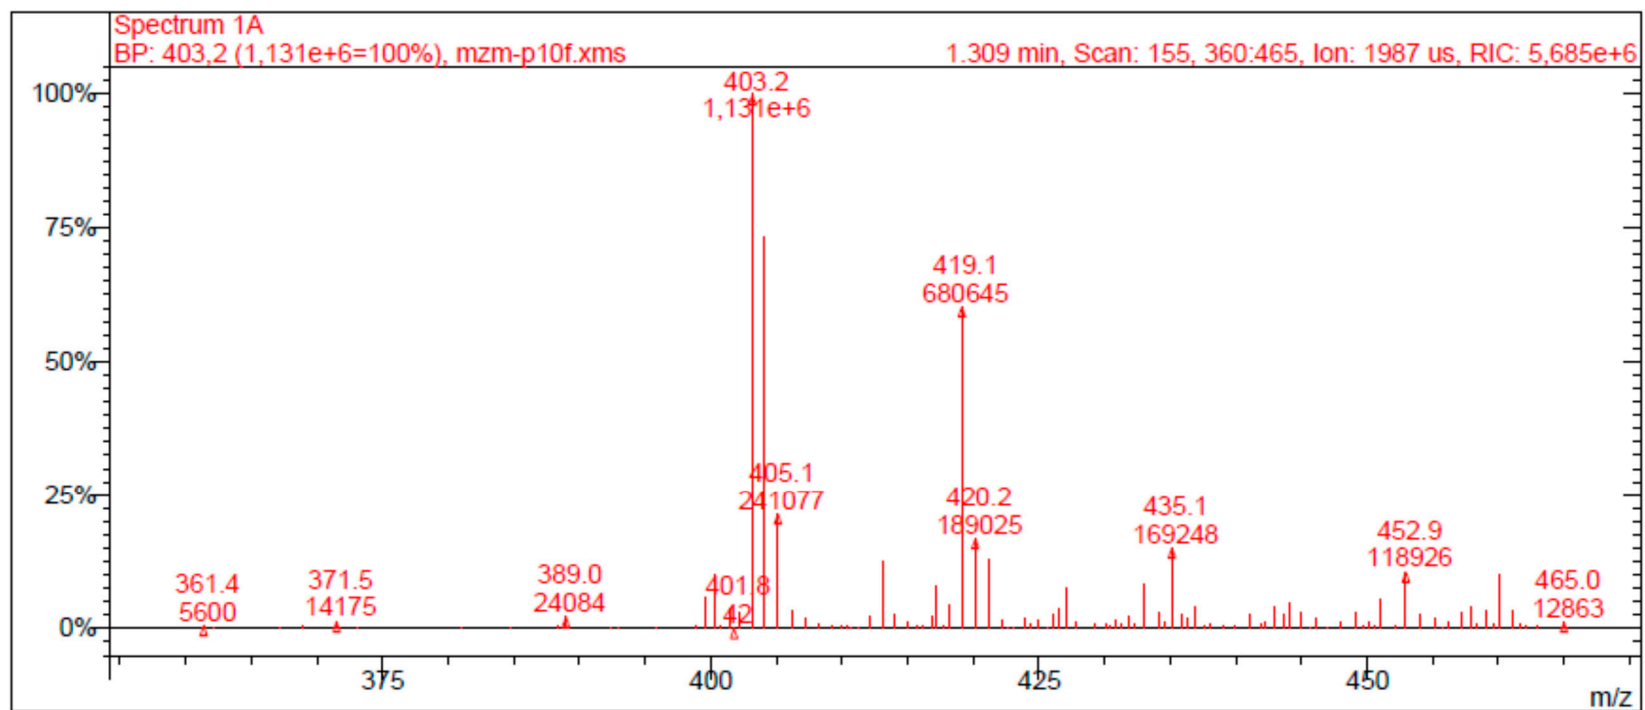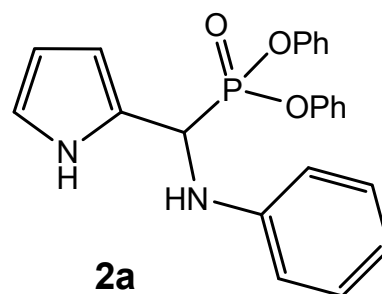

Figure S7a. ESI-MS spectra of diphenyl N-phenylamino(pyrrol-2-yl)-methylphosphonate (**2a**).

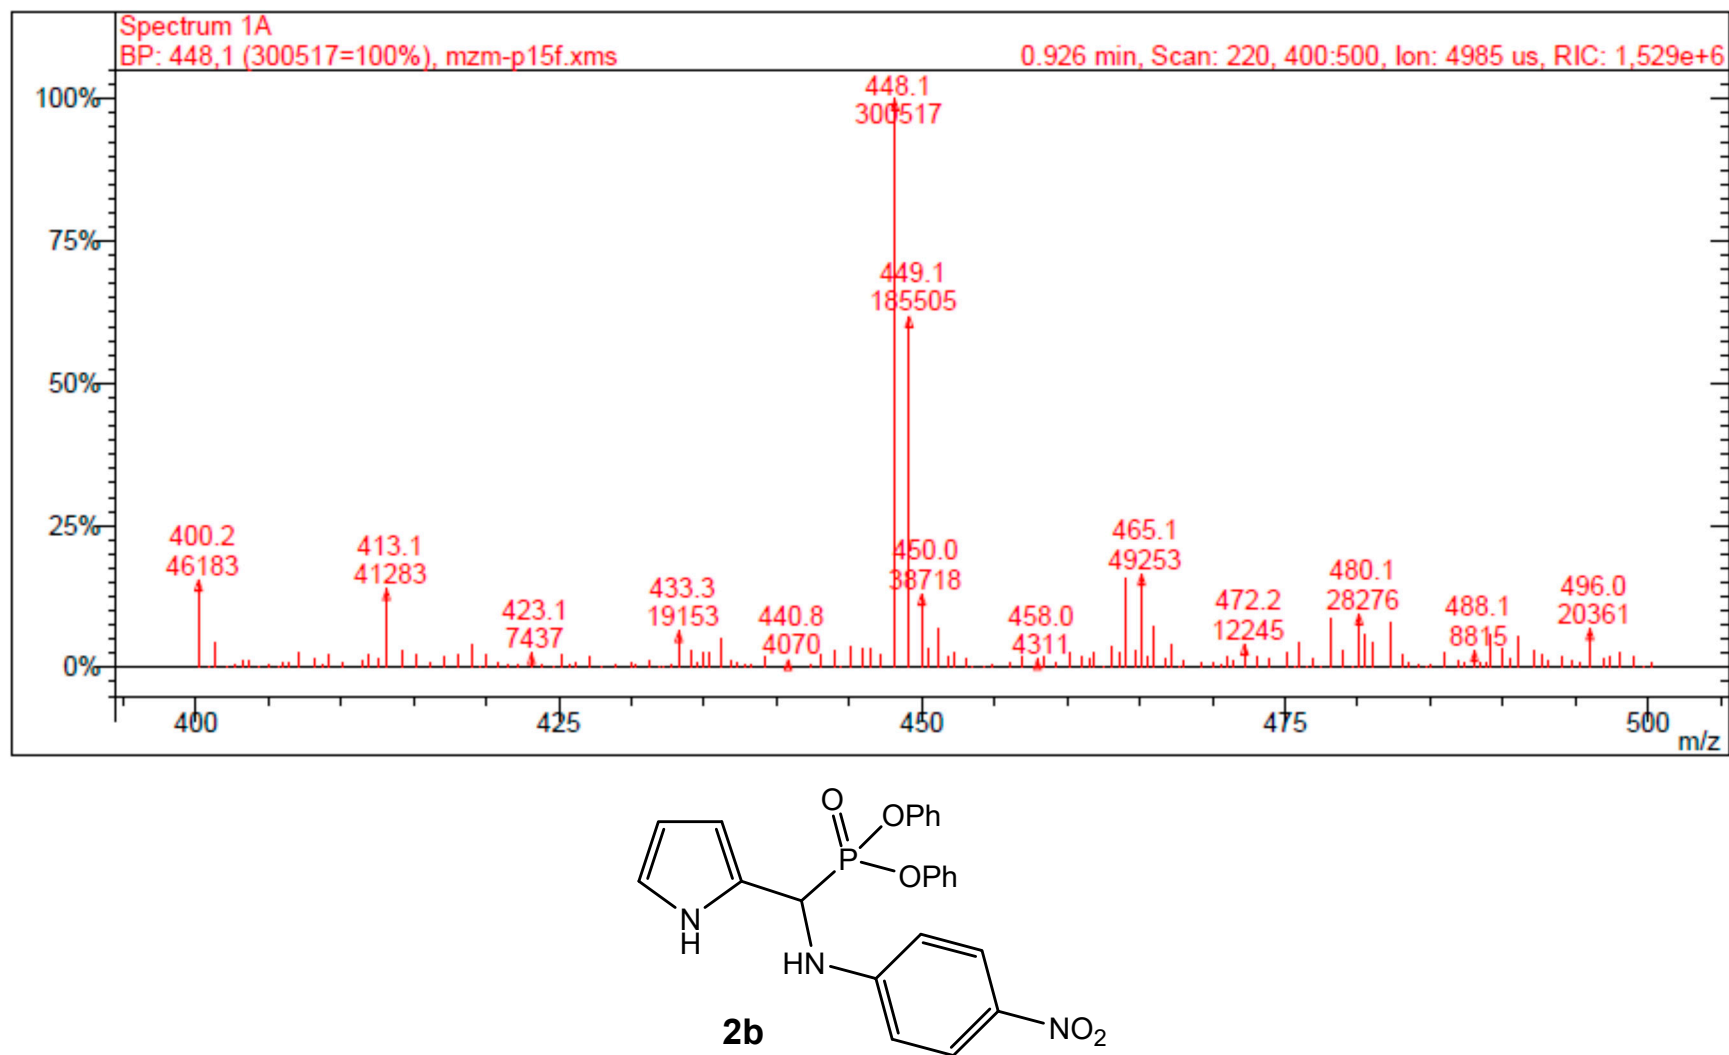

Figure S7b. ESI-MS spectra of diphenyl *N*-(4-nitrophenyl)-amino(pyrrol-2-yl)methylphosphonate (**2b**).

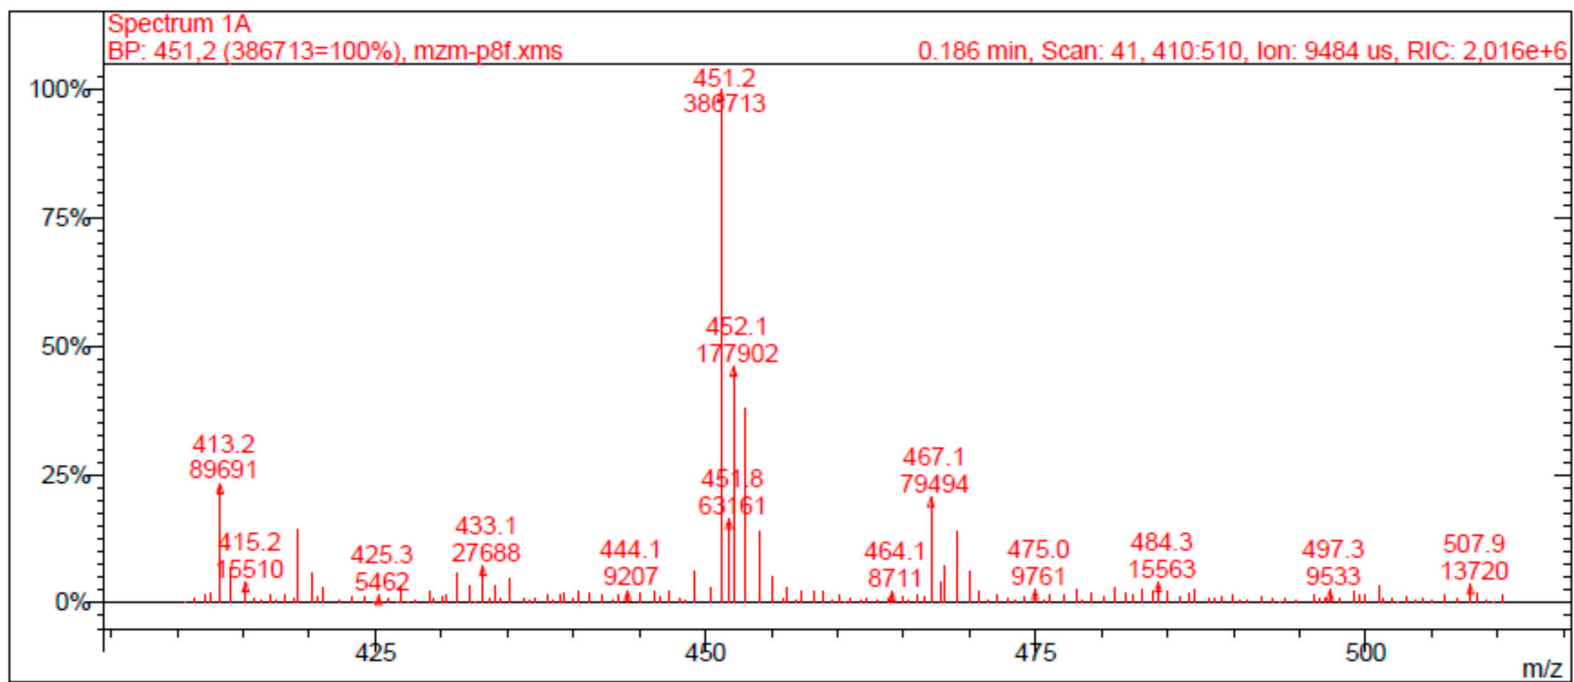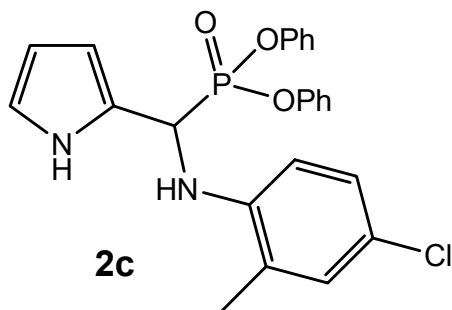

**Figure S7c.** ESI-MS spectra of diphenyl N-(4-chloro-2-methylphenyl)amino-(pyrrol-2-yl)methylphosphonate (**2c**).

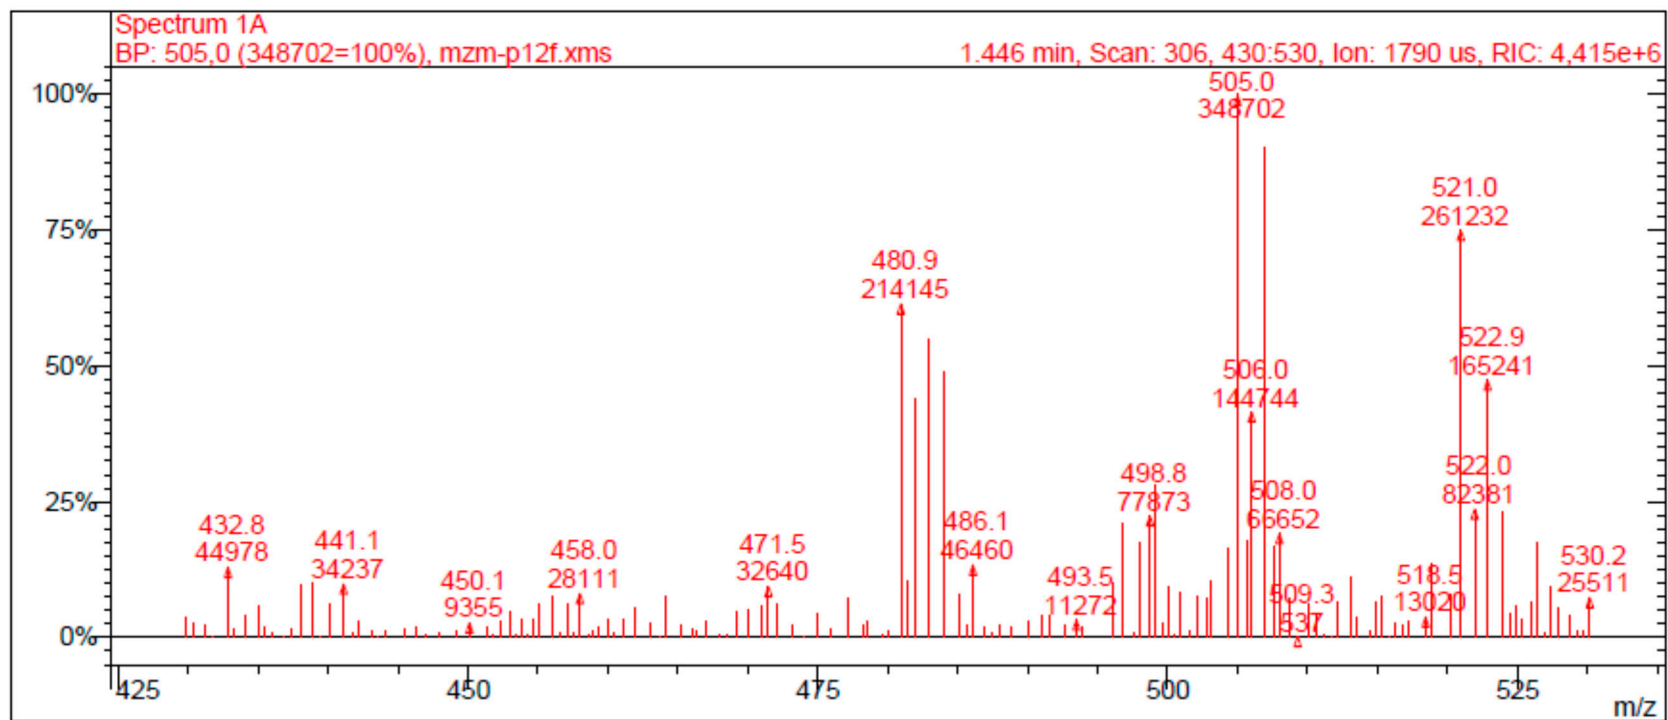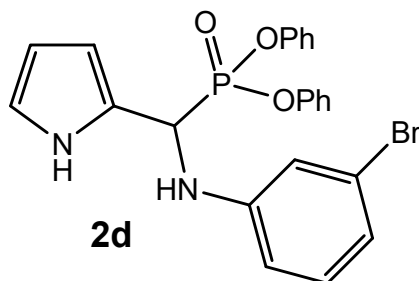

Figure S7d. ESI-MS spectra of diphenyl *N*-(3-bromophenyl)-amino(pyrrol-2-yl)methylphosphonate (**2d**).

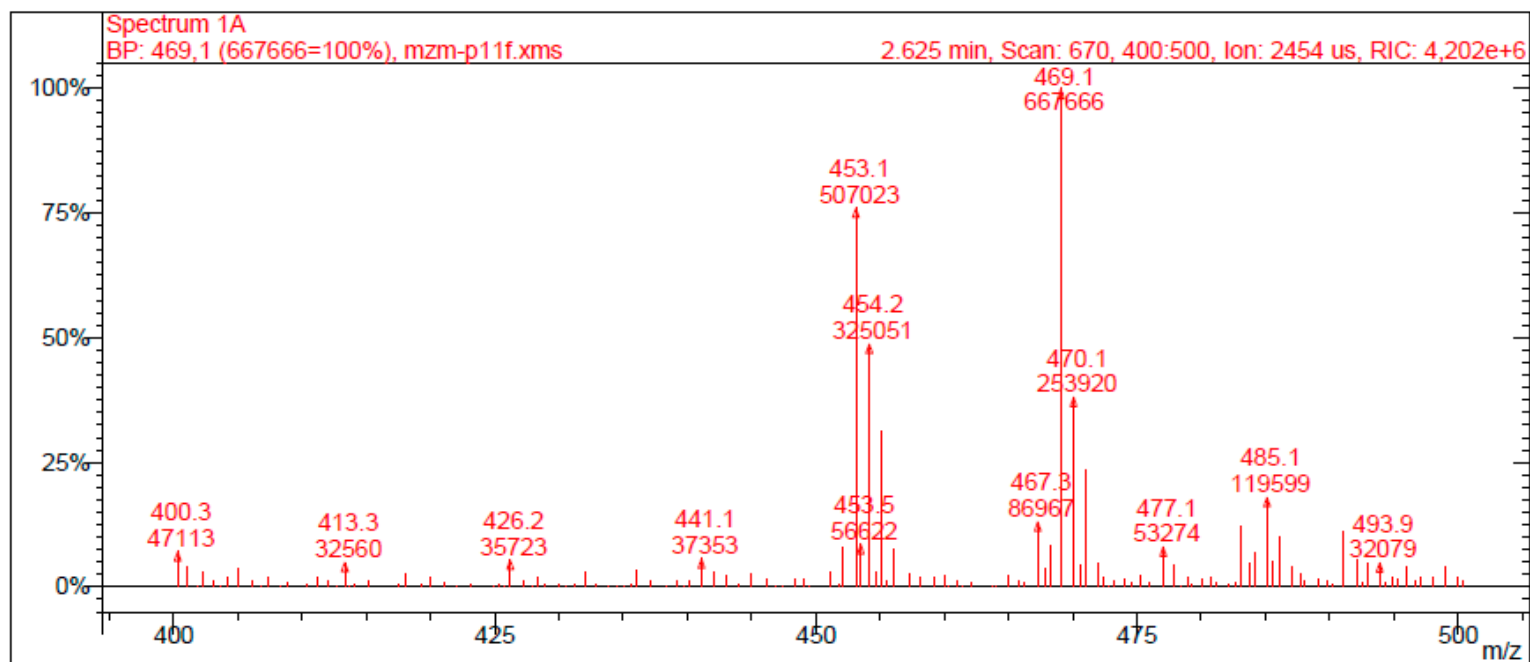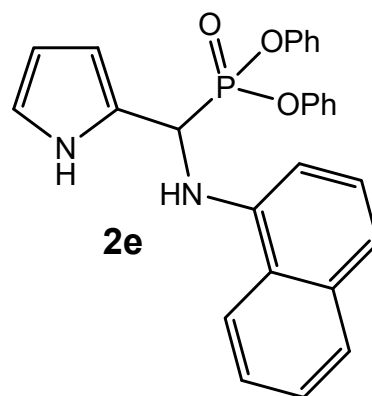

**Figure S7e.** ESI-MS spectra of diphenyl *N*-(1-naphthyl)amino-(pyrrol-2-yl)methylphosphonate (**2e**).
